# Supplementary material for: Interconversion between a Pd3L2 trigonal prism and a Pd6L8 cube via anion exchange: binding affinity of monoatomic vs. polyatomic anions
Source: Royal Society of Chemistry journal article supplement (doi:10.1039/d1dt00859e), 2021-01-01
Supplement: d1dt00859e1.pdf [file d1dt00859e1.pdf]

## **Interconversion between Pd<sub>3</sub>L<sub>2</sub> trigonal prism and Pd<sub>6</sub>L<sub>8</sub> cube via anion exchange: binding affinity of monoatomic vs. polyatomic anions**

Haeri Lee,<sup>a,\*</sup> Jihoon Han<sup>b</sup> Dongwon Kim<sup>b</sup> and Ok-Sang Jung<sup>b,\*</sup>

<sup>a</sup>Department of Chemistry, Hannam University, Daejeon 34054, Korea

<sup>b</sup>Department of Chemistry, Pusan National University, Busan 46241, Korea

## Refinement details

Highly disordered solvate molecules were squeezed out by Platon. The equivalent estimation for squeezed solvents were performed by integration for  $^1\text{H}$  NMR spectra, TG analyses, and elemental analyses. CIFs contain the detailed squeeze information. Most disagreeable reflections were omitted by OMIT instruction.

For 2065305, 2 structures for DMF and 1 structure for 1,4-dioxane are sharing the same position and refined as PART 1, 2, and 3 as suggested occupancies. The structure was refined with TWIN instruction.

For 2065306, this structure is refined as a 2-component inversion twin.

For 2065307, to obtain better diffraction data in lower angle, high angle data could not be collected fully. Since it takes too much time for collection with in-house machine, and which gives worse diffraction, proper amount of data in synchrotron were collected.

For 2065308, the majority of I2, I3, and I5 could be refined at the specific position. Even though their I2, I3, and I5 occupancy is slightly low, but the crystal structure is worth being on the evidence for  $\text{Pd}_3\text{L}_2$  assembly, supporting that anion exchange triggers structural transformation from  $\text{Pd}_6\text{L}_8$  to  $\text{Pd}_3\text{L}_2$ , and a trace of bromide is remained from starting materials.

For 2065309 and 2096698, even though we tried several times to mount the crystals, present data set showed the best result. The crystal was highly air-sensitive and diffracted very weakly especially at higher diffraction angles, which is most likely related to large void volume occupied by disordered solvent molecules. As a result, the crystal quality and data were not good enough, so a sufficient fraction of the unique data is above the 2 sigma level. After several attempt of data collection, the reported one is found as the best. The data were collected in 3rd generation synchrotron beamline which is suitable for small molecules' structures. However, the extremely poor scattering power of the crystals does not allow for higher order data to be collected.

Solvate molecules which are squeezed out were calculated by TG, elemental analyses.

**Table S1.** Crystallographic data of [Pd<sub>3</sub>Cl<sub>6</sub>L<sub>2</sub>] $\cdot$ 3C<sub>4</sub>H<sub>8</sub>O<sub>2</sub> $\cdot$ 3DMF, [Pd<sub>3</sub>Br<sub>6</sub>L<sub>2</sub>] $\cdot$ 2C<sub>4</sub>H<sub>8</sub>O<sub>2</sub> $\cdot$ 5DMF, [Pd<sub>3</sub>I<sub>6</sub>L<sub>2</sub>] $\cdot$ C<sub>4</sub>H<sub>8</sub>O<sub>2</sub> $\cdot$ 2DMF $\cdot$ 3CH<sub>2</sub>I<sub>2</sub>, [Pd<sub>3</sub>I<sub>6</sub>L<sub>2</sub>] $\cdot$ 4Me<sub>2</sub>SO $\cdot$ MeOH, [Pd<sub>6</sub>L<sub>8</sub>]<sup>12+</sup>(BF<sub>4</sub><sup>-</sup>)<sub>12</sub> $\cdot$ 13THF $\cdot$ 7Me<sub>2</sub>SO, and [Pd<sub>6</sub>L<sub>8</sub>]<sup>12+</sup>(CF<sub>3</sub>SO<sub>3</sub><sup>-</sup>)<sub>12</sub> $\cdot$ 15THF $\cdot$ 4Me<sub>2</sub>SO

|                                                           | [Pd <sub>3</sub> Cl <sub>6</sub> L <sub>2</sub> ] $\cdot$ 3C <sub>4</sub> H <sub>8</sub> O <sub>2</sub> $\cdot$ 3DMF | [Pd <sub>3</sub> Br <sub>6</sub> L <sub>2</sub> ] $\cdot$ 2C <sub>4</sub> H <sub>8</sub> O <sub>2</sub> $\cdot$ 5DMF | [Pd <sub>3</sub> I <sub>6</sub> L <sub>2</sub> ] $\cdot$ C <sub>4</sub> H <sub>8</sub> O <sub>2</sub> $\cdot$ 2DMF $\cdot$ 3CH <sub>2</sub> I <sub>2</sub> |
|-----------------------------------------------------------|----------------------------------------------------------------------------------------------------------------------|----------------------------------------------------------------------------------------------------------------------|------------------------------------------------------------------------------------------------------------------------------------------------------------|
| Empirical formula                                         | C <sub>210</sub> H <sub>210</sub> Cl <sub>12</sub> N <sub>30</sub> O <sub>42</sub> Pd <sub>6</sub>                   | C <sub>107</sub> H <sub>111</sub> Br <sub>6</sub> N <sub>17</sub> O <sub>21</sub> Pd <sub>3</sub>                    | C <sub>97</sub> H <sub>88</sub> I <sub>12</sub> N <sub>14</sub> O <sub>16</sub> Pd <sub>3</sub>                                                            |
| Formula weight                                            | 4889.87                                                                                                              | 2769.78                                                                                                              | 3547.81                                                                                                                                                    |
| Temperature (K)                                           | 173(2)                                                                                                               | 173(2) K                                                                                                             | 173(2) K                                                                                                                                                   |
| Wavelength (Å)                                            | 0.71073                                                                                                              | 0.71073 Å                                                                                                            | 0.630 Å                                                                                                                                                    |
| Crystal system                                            | Monoclinic                                                                                                           | Monoclinic                                                                                                           | Triclinic                                                                                                                                                  |
| Space group                                               | <i>P</i> 2 <sub>1</sub>                                                                                              | <i>P</i> 2 <sub>1</sub>                                                                                              | <i>P</i> -1                                                                                                                                                |
| a (Å)                                                     | 14.312(3)                                                                                                            | 14.785(3)                                                                                                            | 17.007(3)                                                                                                                                                  |
| b (Å)                                                     | 25.965(5)                                                                                                            | 26.130(5)                                                                                                            | 18.398(4)                                                                                                                                                  |
| c (Å)                                                     | 15.502(3)                                                                                                            | 15.368(3)                                                                                                            | 21.837(4)                                                                                                                                                  |
| $\alpha$ (°)                                              | -                                                                                                                    | -                                                                                                                    | 90.09(3)                                                                                                                                                   |
| $\beta$ (°)                                               | 107.69(3)                                                                                                            | 108.44(3)                                                                                                            | 107.51(3)                                                                                                                                                  |
| $\gamma$ (°)                                              | -                                                                                                                    | -                                                                                                                    | 116.28(3)                                                                                                                                                  |
| Volume (Å <sup>3</sup> )                                  | 5488(2)                                                                                                              | 5632(2)                                                                                                              | 5769(3)                                                                                                                                                    |
| Z                                                         | 1                                                                                                                    | 2                                                                                                                    | 2                                                                                                                                                          |
| Density (calculated) (Mg/m <sup>3</sup> )                 | 1.479                                                                                                                | 1.633                                                                                                                | 2.042                                                                                                                                                      |
| Absorption coefficient (mm <sup>-1</sup> )                | 0.707                                                                                                                | 2.677                                                                                                                | 2.666                                                                                                                                                      |
| F(000)                                                    | 2496                                                                                                                 | 2776                                                                                                                 | 3340                                                                                                                                                       |
| Crystal size (mm <sup>3</sup> )                           | 0.250 x 0.250 x 0.180                                                                                                | 0.220 x 0.200 x 0.160                                                                                                | 0.126 x 0.114 x 0.082                                                                                                                                      |
| Theta range for data collection                           | 3.089 to 26.372                                                                                                      | 3.008 to 24.712                                                                                                      | 1.518 to 25.000                                                                                                                                            |
| Index ranges                                              | -17<=h<=17,<br>-32<=k<=32,<br>-19<=l<=19                                                                             | -17<=h<=17,<br>-30<=k<=30,<br>-17<=l<=18                                                                             | -22<=h<=22,<br>-24<=k<=24,<br>-29<=l<=29                                                                                                                   |
| Reflections collected                                     | 46129                                                                                                                | 40983                                                                                                                | 54102                                                                                                                                                      |
| Independent reflections                                   | 21975 [R(int) = 0.0568]                                                                                              | 19136 [R(int) = 0.0779]                                                                                              | 27313 [R(int) = 0.0355]                                                                                                                                    |
| Completeness to theta                                     | 99.50%                                                                                                               | 99.60%                                                                                                               | 94.70%                                                                                                                                                     |
| Absorption correction                                     | Semi-empirical from equivalents                                                                                      | Semi-empirical from equivalents                                                                                      | Empirical                                                                                                                                                  |
| Max. and min. transmission                                | 1.000 and 0.789                                                                                                      | 1.0000 and 0.5020                                                                                                    | 1.000 and 0.789                                                                                                                                            |
| Refinement method                                         | Full-matrix least-squares on F <sup>2</sup>                                                                          | Full-matrix least-squares on F <sup>2</sup>                                                                          | Full-matrix least-squares on F <sup>2</sup>                                                                                                                |
| Data / restraints / parameters                            | 21975 / 2598 / 1582                                                                                                  | 19136 / 1911 / 1111                                                                                                  | 27313 / 992 / 1504                                                                                                                                         |
| Goodness-of-fit on F <sup>2</sup>                         | 0.979                                                                                                                | 1.016                                                                                                                | 1.074                                                                                                                                                      |
| Final R indices [I>2 $\sigma$ (I)]                        | R1 = 0.0606,<br>wR2 = 0.1160                                                                                         | R1 = 0.0703,<br>wR2 = 0.1705                                                                                         | R1 = 0.0848,<br>wR2 = 0.2644                                                                                                                               |
| R indices (all data)                                      | R1 = 0.1070,<br>wR2 = 0.1317                                                                                         | R1 = 0.1244,<br>wR2 = 0.1935                                                                                         | R1 = 0.1435,<br>wR2 = 0.2971                                                                                                                               |
| Absolute structure parameter                              | 0.07(3)                                                                                                              | 0.478(17)                                                                                                            | -                                                                                                                                                          |
| Largest diff. peak and hole (e. $\cdot$ Å <sup>-3</sup> ) | 0.915 and -0.453                                                                                                     | 1.243 and -0.532                                                                                                     | 3.521 and -1.961                                                                                                                                           |
| CCDC No.                                                  | 2065305                                                                                                              | 2065306                                                                                                              | 2065307                                                                                                                                                    |

**Table S1.** (*Continued*)

|                                                     | [Pd <sub>3</sub> I <sub>6</sub> L <sub>2</sub> ]-4Me <sub>2</sub> SO·MeOH                                     | [Pd <sub>6</sub> L <sub>8</sub> ] <sup>12+</sup> (BF <sub>4</sub> <sup>-</sup> ) <sub>12</sub> ·13THF<br>·7Me <sub>2</sub> SO    | [Pd <sub>6</sub> L <sub>8</sub> ] <sup>12+</sup> (CF <sub>3</sub> SO <sub>3</sub> <sup>-</sup> ) <sub>12</sub> ·15THF<br>·4Me <sub>2</sub> SO |
|-----------------------------------------------------|---------------------------------------------------------------------------------------------------------------|----------------------------------------------------------------------------------------------------------------------------------|-----------------------------------------------------------------------------------------------------------------------------------------------|
| Empirical formula                                   | C <sub>93</sub> H <sub>88</sub> I <sub>6</sub> N <sub>12</sub> O <sub>17</sub> Pd <sub>3</sub> S <sub>4</sub> | C <sub>402</sub> H <sub>386</sub> B <sub>12</sub> F <sub>48</sub> N <sub>48</sub> O <sub>68</sub> Pd <sub>6</sub> S <sub>7</sub> | C <sub>416</sub> H <sub>384</sub> F <sub>36</sub> N <sub>48</sub> O <sub>103</sub> Pd <sub>6</sub> S <sub>16</sub>                            |
| Formula weight                                      | 2854.59                                                                                                       | 8882.11                                                                                                                          | 9539.05                                                                                                                                       |
| Temperature (K)                                     | 173(2)                                                                                                        | 100(2)                                                                                                                           | 103(2)                                                                                                                                        |
| Wavelength (Å)                                      | 0.71073                                                                                                       | 0.850                                                                                                                            | 0.900                                                                                                                                         |
| Crystal system                                      | Monoclinic                                                                                                    | Cubic                                                                                                                            | Tetragonal                                                                                                                                    |
| Space group                                         | <i>P</i> 2 <sub>1</sub> / <i>n</i>                                                                            | <i>Pn</i> -3 <i>n</i>                                                                                                            | <i>P</i> 4/ <i>mmc</i>                                                                                                                        |
| a (Å)                                               | 17.2568(7)                                                                                                    | 31.903(4)                                                                                                                        | 31.691(4)                                                                                                                                     |
| b (Å)                                               | 22.2766(9)                                                                                                    | -                                                                                                                                | -                                                                                                                                             |
| c (Å)                                               | 25.6771(11)                                                                                                   | -                                                                                                                                | 31.686(6)                                                                                                                                     |
| β (°)                                               | 93.894(3)                                                                                                     | -                                                                                                                                | -                                                                                                                                             |
| Volume (Å <sup>3</sup> )                            | 9848.1(7)                                                                                                     | 32472(11)                                                                                                                        | 31823(11)                                                                                                                                     |
| Z                                                   | 4                                                                                                             | 2                                                                                                                                | 2                                                                                                                                             |
| Density (calculated) (Mg/m <sup>3</sup> )           | 1.925                                                                                                         | 0.908                                                                                                                            | 0.996                                                                                                                                         |
| Absorption coefficient (mm <sup>-1</sup> )          | 2.579                                                                                                         | 0.380                                                                                                                            | 0.536                                                                                                                                         |
| F(000)                                              | 5544                                                                                                          | 9116                                                                                                                             | 9792                                                                                                                                          |
| Crystal size (mm <sup>3</sup> )                     | 0.180 x 0.170 x 0.100                                                                                         | 0.100 x 0.070 x 0.040                                                                                                            | 0.070 x 0.070 x 0.050                                                                                                                         |
| Theta range for data collection                     | 1.379 to 24.999                                                                                               | 1.870 to 30.494                                                                                                                  | 1.151 to 24.349                                                                                                                               |
| Index ranges                                        | -20 ≤ h ≤ 20,                                                                                                 | -37 ≤ h ≤ 37,                                                                                                                    | -28 ≤ h ≤ 28,                                                                                                                                 |
|                                                     | -26 ≤ k ≤ 26,                                                                                                 | -34 ≤ k ≤ 34,                                                                                                                    | -28 ≤ k ≤ 28,                                                                                                                                 |
|                                                     | -30 ≤ l ≤ 30                                                                                                  | -37 ≤ l ≤ 37                                                                                                                     | -28 ≤ l ≤ 28                                                                                                                                  |
| Reflections collected                               | 148236                                                                                                        | 166588                                                                                                                           | 91789                                                                                                                                         |
| Independent reflections                             | 17336 [R(int) = 0.1785]                                                                                       | 4833 [R(int) = 0.1746]                                                                                                           | 6572 [R(int) = 0.1546]                                                                                                                        |
| Completeness to theta                               | 99.90%                                                                                                        | 99.60%                                                                                                                           | 99.00%                                                                                                                                        |
| Absorption correction                               | Semi-empirical from equivalents                                                                               | Empirical                                                                                                                        | Empirical                                                                                                                                     |
| Max. and min. transmission                          | 1.000 and 0.789                                                                                               | 1.000 and 0.899                                                                                                                  | 1.000 and 0.902                                                                                                                               |
| Refinement method                                   | Full-matrix least-squares on F <sup>2</sup>                                                                   | Full-matrix least-squares on F <sup>2</sup>                                                                                      | Full-matrix least-squares on F <sup>2</sup>                                                                                                   |
| Data / restraints / parameters                      | 17336 / 492 / 1135                                                                                            | 4833 / 1094 / 296                                                                                                                | 6572 / 839 / 488                                                                                                                              |
| Goodness-of-fit on F <sup>2</sup>                   | 1.033                                                                                                         | 1.573                                                                                                                            | 1.389                                                                                                                                         |
| Final R indices [I > 2σ(I)]                         | R1 = 0.0693,                                                                                                  | R1 = 0.2070,                                                                                                                     | R1 = 0.1578,                                                                                                                                  |
|                                                     | wR2 = 0.1696                                                                                                  | wR2 = 0.4881                                                                                                                     | wR2 = 0.3837                                                                                                                                  |
| R indices (all data)                                | R1 = 0.1497,                                                                                                  | R1 = 0.2902,                                                                                                                     | R1 = 0.2314,                                                                                                                                  |
|                                                     | wR2 = 0.2121                                                                                                  | wR2 = 0.5498                                                                                                                     | wR2 = 0.4487                                                                                                                                  |
| Largest diff. peak and hole<br>(e.Å <sup>-3</sup> ) | 1.574 and -1.259                                                                                              | 1.510 and -1.592                                                                                                                 | 1.264 and -0.939                                                                                                                              |
| CCDC No.                                            | 2065308                                                                                                       | 2065309                                                                                                                          | 2096698                                                                                                                                       |

**Table S2.** Selected bond length and angles of [Pd<sub>3</sub>Cl<sub>6</sub>L<sub>2</sub>] $\cdot$ 3C<sub>4</sub>H<sub>8</sub>O<sub>2</sub> $\cdot$ 3DMF, [Pd<sub>3</sub>Br<sub>6</sub>L<sub>2</sub>] $\cdot$ 2C<sub>4</sub>H<sub>8</sub>O<sub>2</sub> $\cdot$ 5DMF, [Pd<sub>3</sub>I<sub>6</sub>L<sub>2</sub>] $\cdot$ C<sub>4</sub>H<sub>8</sub>O<sub>2</sub> $\cdot$ 2DMF $\cdot$ 3CH<sub>2</sub>I<sub>2</sub>, [Pd<sub>3</sub>I<sub>6</sub>L<sub>2</sub>] $\cdot$ 4Me<sub>2</sub>SO $\cdot$ MeOH, [Pd<sub>6</sub>L<sub>8</sub>]<sup>12+</sup>(BF<sub>4</sub><sup>-</sup>)<sub>12</sub> $\cdot$ 13THF $\cdot$ 7Me<sub>2</sub>SO, and [Pd<sub>6</sub>L<sub>8</sub>]<sup>12+</sup>(CF<sub>3</sub>SO<sub>3</sub><sup>-</sup>)<sub>12</sub> $\cdot$ 15THF $\cdot$ 4Me<sub>2</sub>SO

| [Pd <sub>3</sub> Cl <sub>6</sub> L <sub>2</sub> ] $\cdot$ 3C <sub>4</sub> H <sub>8</sub> O <sub>2</sub> $\cdot$ 3DMF |            | [Pd <sub>3</sub> Br <sub>6</sub> L <sub>2</sub> ] $\cdot$ 2C <sub>4</sub> H <sub>8</sub> O <sub>2</sub> $\cdot$ 5DMF |            | [Pd <sub>3</sub> I <sub>6</sub> L <sub>2</sub> ] $\cdot$ C <sub>4</sub> H <sub>8</sub> O <sub>2</sub> $\cdot$ 2DMF $\cdot$ 3CH <sub>2</sub> I <sub>2</sub> |            | [Pd <sub>3</sub> I <sub>6</sub> L <sub>2</sub> ] $\cdot$ 4Me <sub>2</sub> SO $\cdot$ MeOH |            |
|----------------------------------------------------------------------------------------------------------------------|------------|----------------------------------------------------------------------------------------------------------------------|------------|------------------------------------------------------------------------------------------------------------------------------------------------------------|------------|-------------------------------------------------------------------------------------------|------------|
| Pd11-N13                                                                                                             | 2.009(7)   | Pd11-N14                                                                                                             | 1.983(8)   | Pd(1)-N(17B)                                                                                                                                               | 2.014(7)   | Pd(1)-N(7)                                                                                | 2.018(8)   |
| Pd11-N14                                                                                                             | 2.032(7)   | Pd11-N13                                                                                                             | 1.991(9)   | Pd(1)-N(17A)                                                                                                                                               | 2.024(8)   | Pd(1)-N(1)                                                                                | 2.027(8)   |
| Pd11-Cl12                                                                                                            | 2.286(3)   | Pd11-Br42                                                                                                            | 2.413(3)   | Pd(1)-I(2)                                                                                                                                                 | 2.5993(13) | Pd(1)-I(2 <sup>a</sup> )                                                                  | 2.5621(15) |
| Pd11-Cl22                                                                                                            | 2.296(3)   | Pd11-Br52                                                                                                            | 2.433(3)   | Pd(1)-I(1)                                                                                                                                                 | 2.6022(14) | Pd(1)-I(1)                                                                                | 2.6097(13) |
| Pd21-N34 <sup>a</sup>                                                                                                | 2.10(2)    | Pd21-N34                                                                                                             | 2.004(8)   | Pd(2)-N(33A)                                                                                                                                               | 2.007(7)   | Pd(2)-N(9)                                                                                | 2.015(8)   |
| Pd21-N33 <sup>a</sup>                                                                                                | 2.105(8)   | Pd21-N33                                                                                                             | 2.016(7)   | Pd(2)-N(33B)                                                                                                                                               | 2.011(7)   | Pd(2)-N(3)                                                                                | 2.016(9)   |
| Pd21-Cl42                                                                                                            | 2.281(3)   | Pd21-Br62                                                                                                            | 2.413(2)   | Pd(2)-I(4)                                                                                                                                                 | 2.5925(16) | Pd(2)-I(3 <sup>a</sup> )                                                                  | 2.4978(17) |
| Pd21-Cl32                                                                                                            | 2.293(3)   | Pd21-Br72                                                                                                            | 2.442(2)   | Pd(2)-I(3)                                                                                                                                                 | 2.6017(15) | Pd(2)-I(4)                                                                                | 2.6077(14) |
| Pd31-N53 <sup>a</sup>                                                                                                | 2.113(16)  | Pd31-N54                                                                                                             | 1.981(8)   | Pd(3)-N(49B)                                                                                                                                               | 2.030(7)   | Pd(3)-N(11)                                                                               | 2.007(8)   |
| Pd31-N54 <sup>a</sup>                                                                                                | 2.10(2)    | Pd31-N53                                                                                                             | 2.013(8)   | Pd(3)-N(49A)                                                                                                                                               | 2.036(7)   | Pd(3)-N(5)                                                                                | 2.030(9)   |
| Pd31-Cl62                                                                                                            | 2.280(3)   | Pd31-Br82                                                                                                            | 2.432(3)   | Pd(3)-I(5)                                                                                                                                                 | 2.5970(13) | Pd(3)-I(5 <sup>a</sup> )                                                                  | 2.5719(14) |
| Pd31-Cl52                                                                                                            | 2.302(4)   | Pd31-Br92                                                                                                            | 2.437(2)   | Pd(3)-I(6)                                                                                                                                                 | 2.5995(15) | Pd(3)-I(6)                                                                                | 2.5925(12) |
| N13-Pd11-N14                                                                                                         | 179.2(4)   | N14-Pd11-N13                                                                                                         | 177.8(5)   | N(17B)-Pd(1)-N(17A)                                                                                                                                        | 171.3(4)   | N(7)-Pd(1)-N(1)                                                                           | 178.4(4)   |
| N13-Pd11-Cl12                                                                                                        | 89.3(3)    | N14-Pd11-Br42                                                                                                        | 89.5(4)    | N(17B)-Pd(1)-I(2)                                                                                                                                          | 86.3(2)    | N(7)-Pd(1)-I(2 <sup>a</sup> )                                                             | 92.5(3)    |
| N14-Pd11-Cl12                                                                                                        | 91.4(3)    | N13-Pd11-Br42                                                                                                        | 91.2(4)    | N(17A)-Pd(1)-I(2)                                                                                                                                          | 90.9(3)    | N(1)-Pd(1)-I(2 <sup>a</sup> )                                                             | 88.2(3)    |
| N13-Pd11-Cl22                                                                                                        | 89.2(3)    | N14-Pd11-Br52                                                                                                        | 89.2(4)    | N(17B)-Pd(1)-I(1)                                                                                                                                          | 91.6(2)    | N(7)-Pd(1)-I(1)                                                                           | 90.1(3)    |
| N14-Pd11-Cl22                                                                                                        | 90.0(3)    | N13-Pd11-Br52                                                                                                        | 89.9(4)    | N(17A)-Pd(1)-I(1)                                                                                                                                          | 91.8(3)    | N(1)-Pd(1)-I(1)                                                                           | 89.5(3)    |
| Cl12-Pd11-Cl22                                                                                                       | 178.55(9)  | Br42-Pd11-Br52                                                                                                       | 177.03(11) | I(2)-Pd(1)-I(1)                                                                                                                                            | 174.56(5)  | I(2 <sup>a</sup> )-Pd(1)-I(1)                                                             | 168.27(6)  |
| N34 <sup>a</sup> -Pd21-N33 <sup>a</sup>                                                                              | 177.5(9)   | N34-Pd21-N33                                                                                                         | 179.3(5)   | N(33A)-Pd(2)-N(33B)                                                                                                                                        | 178.6(3)   | N(9)-Pd(2)-N(3)                                                                           | 175.3(4)   |
| N34 <sup>a</sup> -Pd21-Cl42                                                                                          | 89.5(7)    | N34-Pd21-Br62                                                                                                        | 89.4(3)    | N(33A)-Pd(2)-I(4)                                                                                                                                          | 91.0(3)    | N(9)-Pd(2)-I(3 <sup>a</sup> )                                                             | 89.3(3)    |
| N33 <sup>a</sup> -Pd21-Cl42                                                                                          | 89.8(4)    | N33-Pd21-Br62                                                                                                        | 90.7(3)    | N(33B)-Pd(2)-I(4)                                                                                                                                          | 89.3(2)    | N(3)-Pd(2)-I(3 <sup>a</sup> )                                                             | 90.5(3)    |
| N34 <sup>a</sup> -Pd21-Cl32                                                                                          | 90.9(7)    | N34-Pd21-Br72                                                                                                        | 90.3(3)    | N(33A)-Pd(2)-I(3)                                                                                                                                          | 91.0(3)    | N(9)-Pd(2)-I(4)                                                                           | 92.3(3)    |
| N33 <sup>a</sup> -Pd21-Cl32                                                                                          | 89.8(4)    | N33-Pd21-Br72                                                                                                        | 89.6(3)    | N(33B)-Pd(2)-I(3)                                                                                                                                          | 88.8(2)    | N(3)-Pd(2)-I(4)                                                                           | 88.7(3)    |
| Cl42-Pd21-Cl32                                                                                                       | 179.59(11) | Br62-Pd21-Br72                                                                                                       | 177.63(11) | I(4)-Pd(2)-I(3)                                                                                                                                            | 177.30(4)  | I(3 <sup>a</sup> )-Pd(2)-I(4)                                                             | 168.88(6)  |
| N54 <sup>a</sup> -Pd31-N53 <sup>a</sup>                                                                              | 173.9(10)  | N54-Pd31-N53                                                                                                         | 176.8(5)   | N(49B)-Pd(3)-N(49A)                                                                                                                                        | 178.0(3)   | N(11)-Pd(3)-N(5)                                                                          | 177.4(4)   |
| N54 <sup>a</sup> -Pd31-Cl62                                                                                          | 91.5(10)   | N54-Pd31-Br82                                                                                                        | 88.2(4)    | N(49B)-Pd(3)-I(5)                                                                                                                                          | 89.6(3)    | N(11)-Pd(3)-I(5 <sup>a</sup> )                                                            | 86.9(2)    |
| N53 <sup>a</sup> -Pd31-Cl62                                                                                          | 84.0(5)    | N53-Pd31-Br82                                                                                                        | 89.4(3)    | N(49A)-Pd(3)-I(5)                                                                                                                                          | 89.9(3)    | N(5)-Pd(3)-I(5 <sup>a</sup> )                                                             | 91.4(3)    |
| N54 <sup>a</sup> -Pd31-Cl52                                                                                          | 87.5(10)   | N54-Pd31-Br92                                                                                                        | 92.2(4)    | N(49B)-Pd(3)-I(6)                                                                                                                                          | 90.7(3)    | N(11)-Pd(3)-I(6)                                                                          | 90.1(2)    |
| N53 <sup>a</sup> -Pd31-Cl52                                                                                          | 96.7(5)    | N53-Pd31-Br92                                                                                                        | 90.5(3)    | N(49A)-Pd(3)-I(6)                                                                                                                                          | 89.6(3)    | N(5)-Pd(3)-I(6)                                                                           | 91.4(3)    |
| Cl62-Pd31-Cl52                                                                                                       | 175.71(12) | Br82-Pd31-Br92                                                                                                       | 172.76(10) | I(5)-Pd(3)-I(6)                                                                                                                                            | 176.34(5)  | I(5 <sup>a</sup> )-Pd(3)-I(6)                                                             | 176.04(5)  |

**Table S2.** (Continued)

| <b>[Pd<sub>6</sub>L<sub>8</sub>]<sup>12+</sup>(BF<sub>4</sub><sup>-</sup>)<sub>12</sub>·13THF·7Me<sub>2</sub>SO</b> |           | <b>[Pd<sub>6</sub>L<sub>8</sub>]<sup>12+</sup>(CF<sub>3</sub>SO<sub>3</sub><sup>-</sup>)<sub>12</sub>·15THF·4Me<sub>2</sub>SO</b> |           |
|---------------------------------------------------------------------------------------------------------------------|-----------|-----------------------------------------------------------------------------------------------------------------------------------|-----------|
| Pd(1)-N(2B)                                                                                                         | 2.049(11) | Pd(1)-N(19)#1                                                                                                                     | 1.920(13) |
| Pd(1)-N(2B)#1                                                                                                       | 2.049(11) | Pd(1)-N(19)                                                                                                                       | 1.920(13) |
| Pd(1)-N(2B)#2                                                                                                       | 2.049(11) | Pd(1)-N(51)#2                                                                                                                     | 2.071(11) |
| Pd(1)-N(2B)#3                                                                                                       | 2.049(11) | Pd(1)-N(51)#3                                                                                                                     | 2.071(11) |
| Pd(1)-N(2)                                                                                                          | 2.089(11) | Pd(2)-N(35)                                                                                                                       | 2.039(11) |
| Pd(1)-N(2)#2                                                                                                        | 2.089(11) | Pd(2)-N(35)#4                                                                                                                     | 2.039(11) |
| Pd(1)-N(2)#1                                                                                                        | 2.089(11) | Pd(2)-N(35)#5                                                                                                                     | 2.039(11) |
| Pd(1)-N(2)#3                                                                                                        | 2.089(12) | Pd(2)-N(35)#3                                                                                                                     | 2.039(11) |
| <hr/>                                                                                                               |           |                                                                                                                                   |           |
| N(2B)-Pd(1)-N(2B)#1                                                                                                 | 88.46(16) | N(19)#1-Pd(1)-N(19)                                                                                                               | 171.0(14) |
| N(2)-Pd(1)-N(2)#2                                                                                                   | 86.7(2)   | N(19)#1-Pd(1)-N(51)#2                                                                                                             | 93.6(6)   |
| N(2B)-Pd(1)-N(2)#1                                                                                                  | 89.4(8)   | N(19)-Pd(1)-N(51)#2                                                                                                               | 86.2(6)   |
| N(2B)#1-Pd(1)-N(2)#1                                                                                                | 23.4(6)   | N(19)#1-Pd(1)-N(51)#3                                                                                                             | 86.2(6)   |
| N(2B)#2-Pd(1)-N(2)#1                                                                                                | 174.8(8)  | N(19)-Pd(1)-N(51)#3                                                                                                               | 93.6(6)   |
| N(2B)#3-Pd(1)-N(2)#1                                                                                                | 95.0(8)   | N(51)#2-Pd(1)-N(51)#3                                                                                                             | 177.8(10) |
| N(2)-Pd(1)-N(2)#1                                                                                                   | 86.7(2)   | N(35)-Pd(2)-N(35)#4                                                                                                               | 170.5(12) |
| N(2)#2-Pd(1)-N(2)#1                                                                                                 | 152.4(9)  | N(35)-Pd(2)-N(35)#5                                                                                                               | 89.61(10) |
| N(2)-Pd(1)-N(2)#3                                                                                                   | 152.4(9)  | N(35)#4-Pd(2)-N(35)#5                                                                                                             | 89.61(10) |
| N(2)#2-Pd(1)-N(2)#3                                                                                                 | 86.7(2)   | N(35)-Pd(2)-N(35)#3                                                                                                               | 89.60(10) |
| N(2)#1-Pd(1)-N(2)#3                                                                                                 | 86.7(2)   | N(35)#4-Pd(2)-N(35)#3                                                                                                             | 89.61(10) |
|                                                                                                                     |           | N(35)#5-Pd(2)-N(35)#3                                                                                                             | 170.5(12) |
| <hr/>                                                                                                               |           |                                                                                                                                   |           |
| #1 -z+1/2, y, x                                                                                                     |           | #1 x, -y+1/2, -z+3/2                                                                                                              |           |
| #2 z, y, -x+1/2                                                                                                     |           | #2 y, x, -z+3/2                                                                                                                   |           |
| #3 -x+1/2, y, -z+1/2                                                                                                |           | #3 y, -x+1/2, z                                                                                                                   |           |
|                                                                                                                     |           | #4 -x+1/2, -y+1/2, z                                                                                                              |           |
|                                                                                                                     |           | #5 -y+1/2, x, z                                                                                                                   |           |

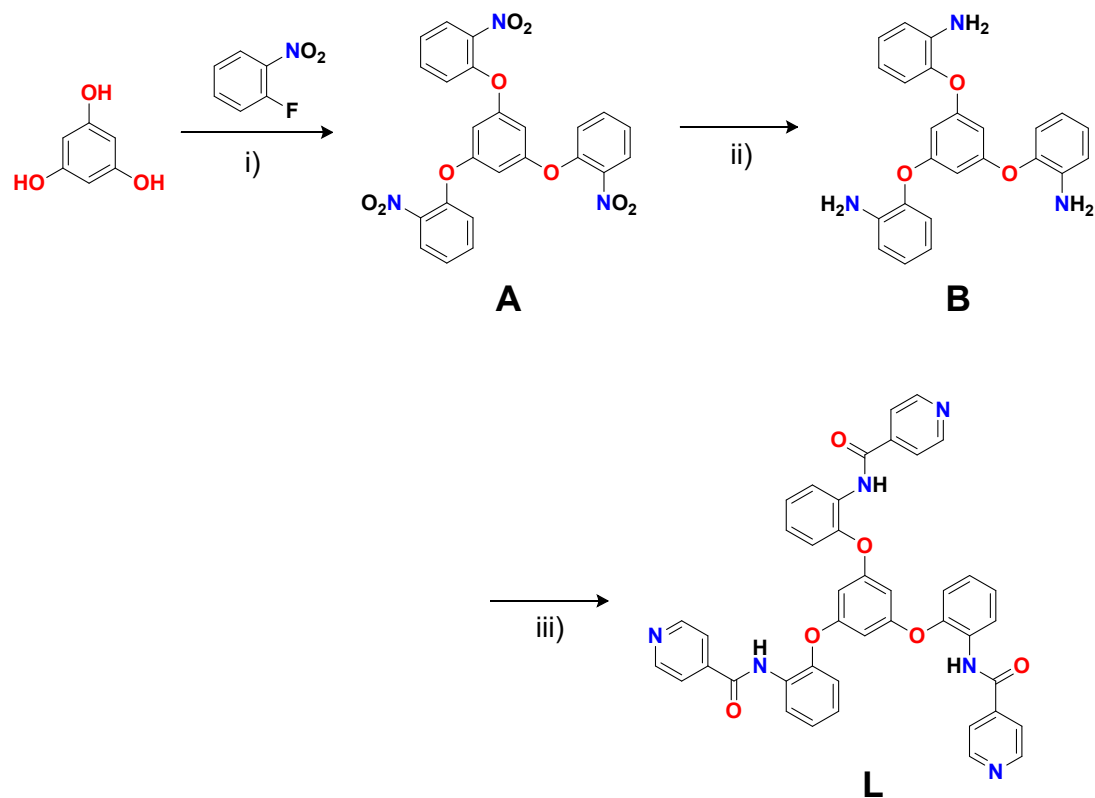

**Scheme S1.** Synthesis procedure for ligand (L), i) 1-fluoro-2-nitrobenzene,  $K_2CO_3$  in DMF, ii) HCl, Fe powder, KOH in ethanol and iii) isonicotinoyl chloride hydrochloride, triethylamine in  $CHCl_3$



### Synthesis of 1,3,5-tris(2'-nitrophenoxy)benzene (A)

A mixture of phloroglucinol (1.2 g, 10 mmol), 1-fluoro-2-nitrobenzene (4.65 g, 33 mmol), and potassium carbonate (13.5 g, 90 mmol) in 100 mL of *N,N*-dimethylformamide (DMF) was heated to 120 °C for 1 d. The reaction mixture was then cooled to room temperature and the precipitate was filtered out. 1,3,5-tris(2'-nitrophenoxy)benzene (A) was recrystallized in DMF/H<sub>2</sub>O (90% yield (4.4 g)). <sup>1</sup>H NMR (400 MHz, DMSO-*d*<sub>6</sub>) δ 8.06 (d, *J* = 8.1 Hz, 3H), 7.73 (d, *J* = 8.1 Hz, 3H), 7.40 (d, *J* = 8.4 Hz, 3H), 7.33 (d, *J* = 8.4 Hz, 3H), 6.59 (s, 3H). <sup>13</sup>C NMR (101 MHz, DMSO) δ 158.69, 148.54, 141.65, 135.72, 126.30, 125.65, 122.20, 104.64. HR-ESI-TOF-MS (*m/z*): [C<sub>24</sub>H<sub>15</sub>N<sub>3</sub>O<sub>9</sub> + Na<sup>+</sup>]<sup>+</sup> = 512.0704 (calc. 512.0706).

### Synthesis of 1,3,5-tris(2'-aminophenoxy)benzene (B)

HCl (0.6 mL concd. HCl in 10 mL of 50% ethanol) was slowly added to a stirred solution of A (3.4 g, 7 mmol) and Fe powder (5.6 g, 100 mmol) in 50% ethanol (150 mL), and then stirred at 85 °C for 1 d. After the reaction, 15% KOH was added and stirred for 30 min. After the precipitate was filtered off, the solution was concentrated to 30 mL under vacuo and extracted with water and chloroform. The organic layer was dried over MgSO<sub>4</sub>. After removal of solvent, the residue was dried over under vacuo at 40 °C, which is produced 1,3,5-tris(2'-aminophenoxy)benzene (B, 2.5 g, 91%). <sup>1</sup>H NMR (400 MHz, DMSO-*d*<sub>6</sub>) δ 6.91 (t, *J* = 7.6 Hz, 3H), 6.83 (d, *J* = 8.0 Hz, 3H), 6.78 (d, *J* = 7.9 Hz, 3H), 6.53 (s, 3H), 6.10 (s, 3H), 4.88 (s, 6H). <sup>13</sup>C NMR (101 MHz, DMSO) δ = 160.06, 141.19, 141.00, 125.97, 121.22, 116.92, 116.55, 99.17. HR-ESI-TOF-MS (*m/z*): [C<sub>24</sub>H<sub>21</sub>N<sub>3</sub>O<sub>3</sub> + H<sup>+</sup>]<sup>+</sup> = 400.1662 (calc. 400.1661).

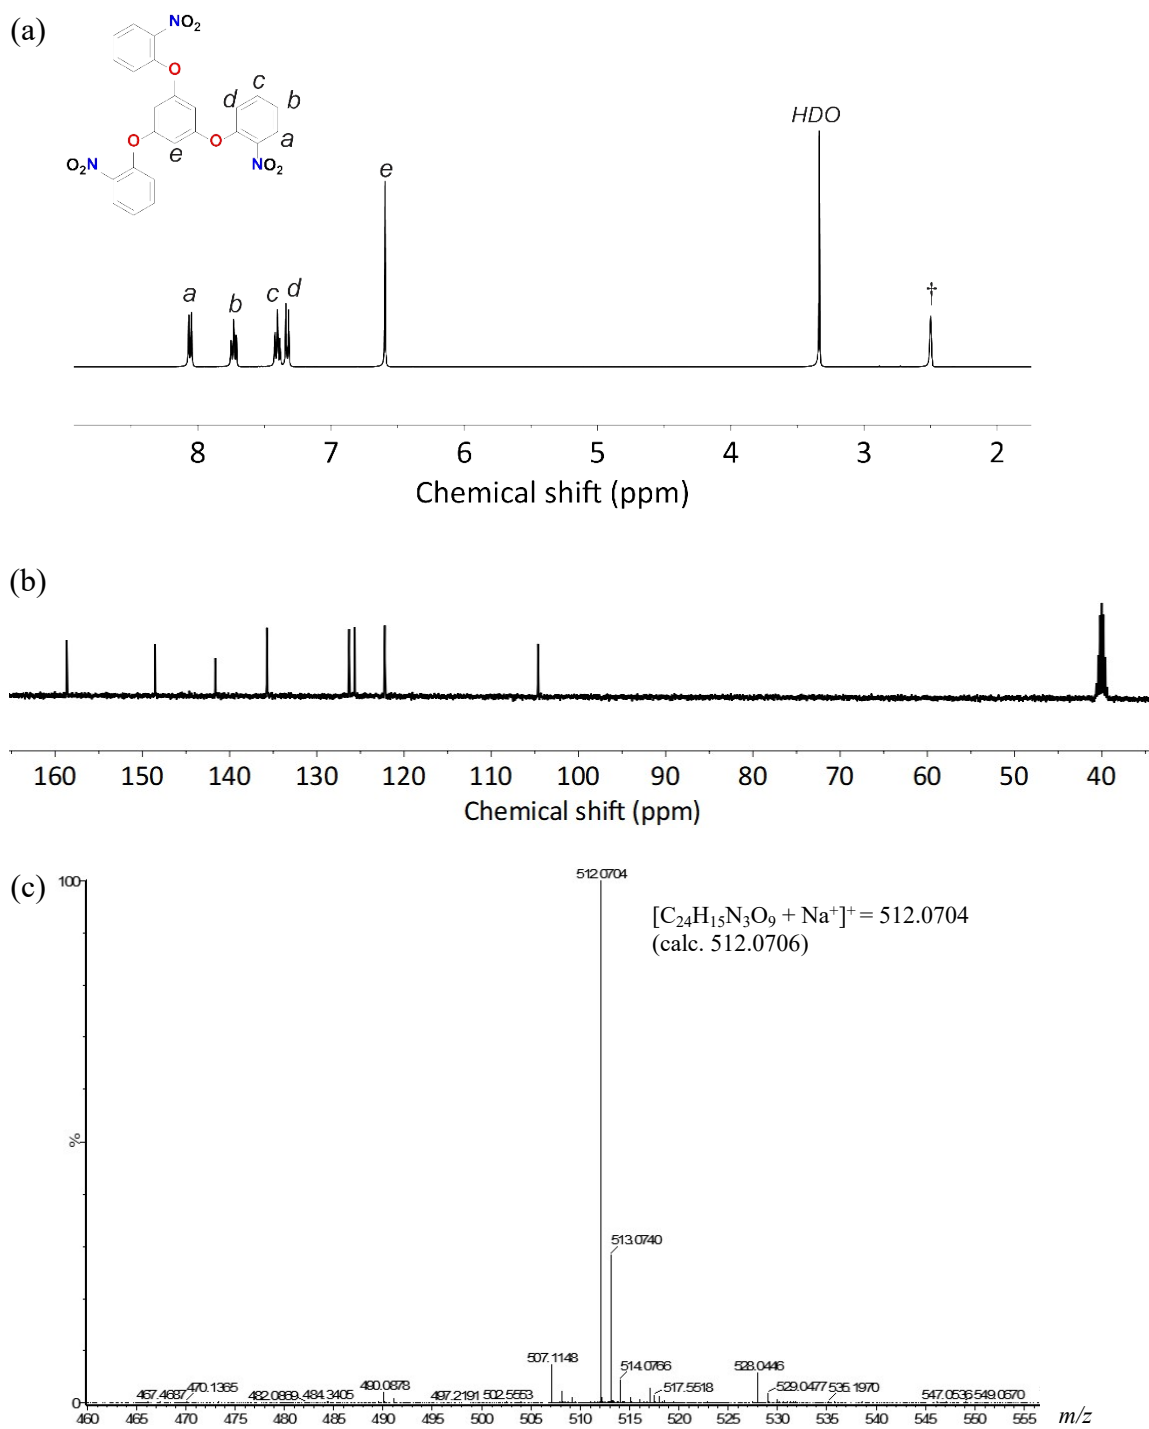

**Figure S1.**  $^1\text{H}$  NMR (a),  $^{13}\text{C}$  NMR (b), and HR-ESI-Mass (c) spectra for A (†: residue of  $\text{Me}_2\text{SO}-d_6$ ).

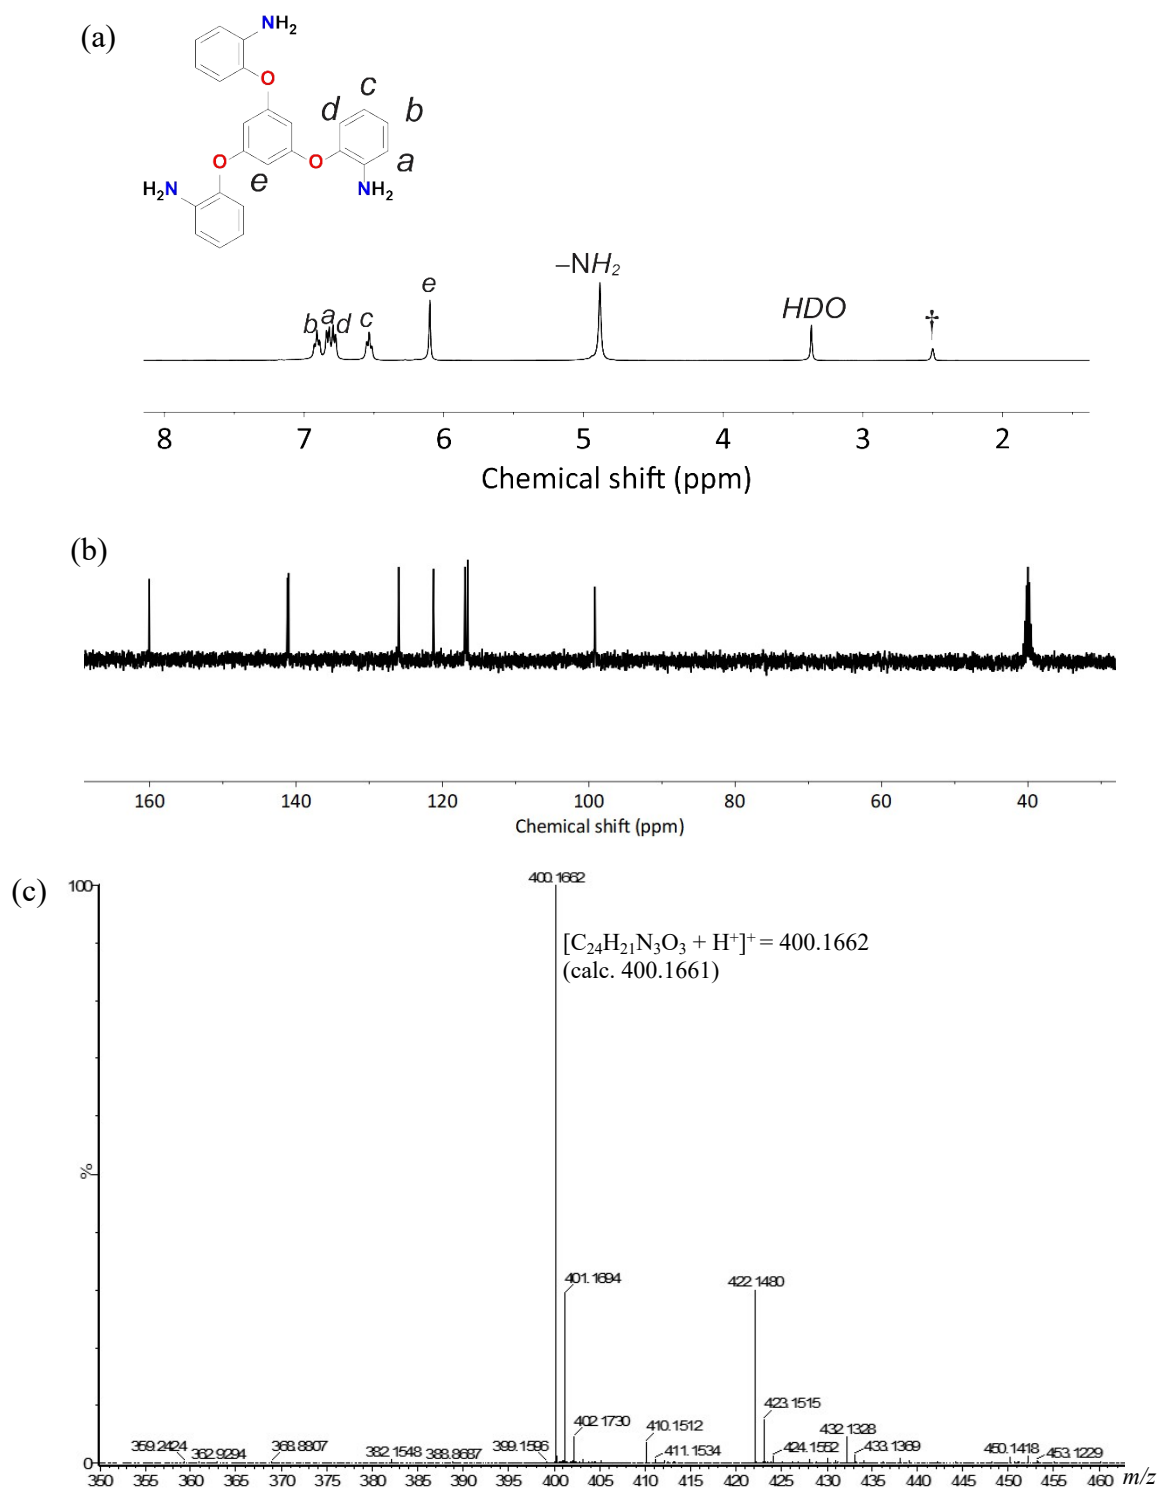

**Figure S2.**  $^1\text{H}$  NMR (a),  $^{13}\text{C}$  NMR (b), and high resolution ESI-Mass (c) spectra for **B** ( $\dagger$ : residue of  $\text{Me}_2\text{SO}-d_6$ ).

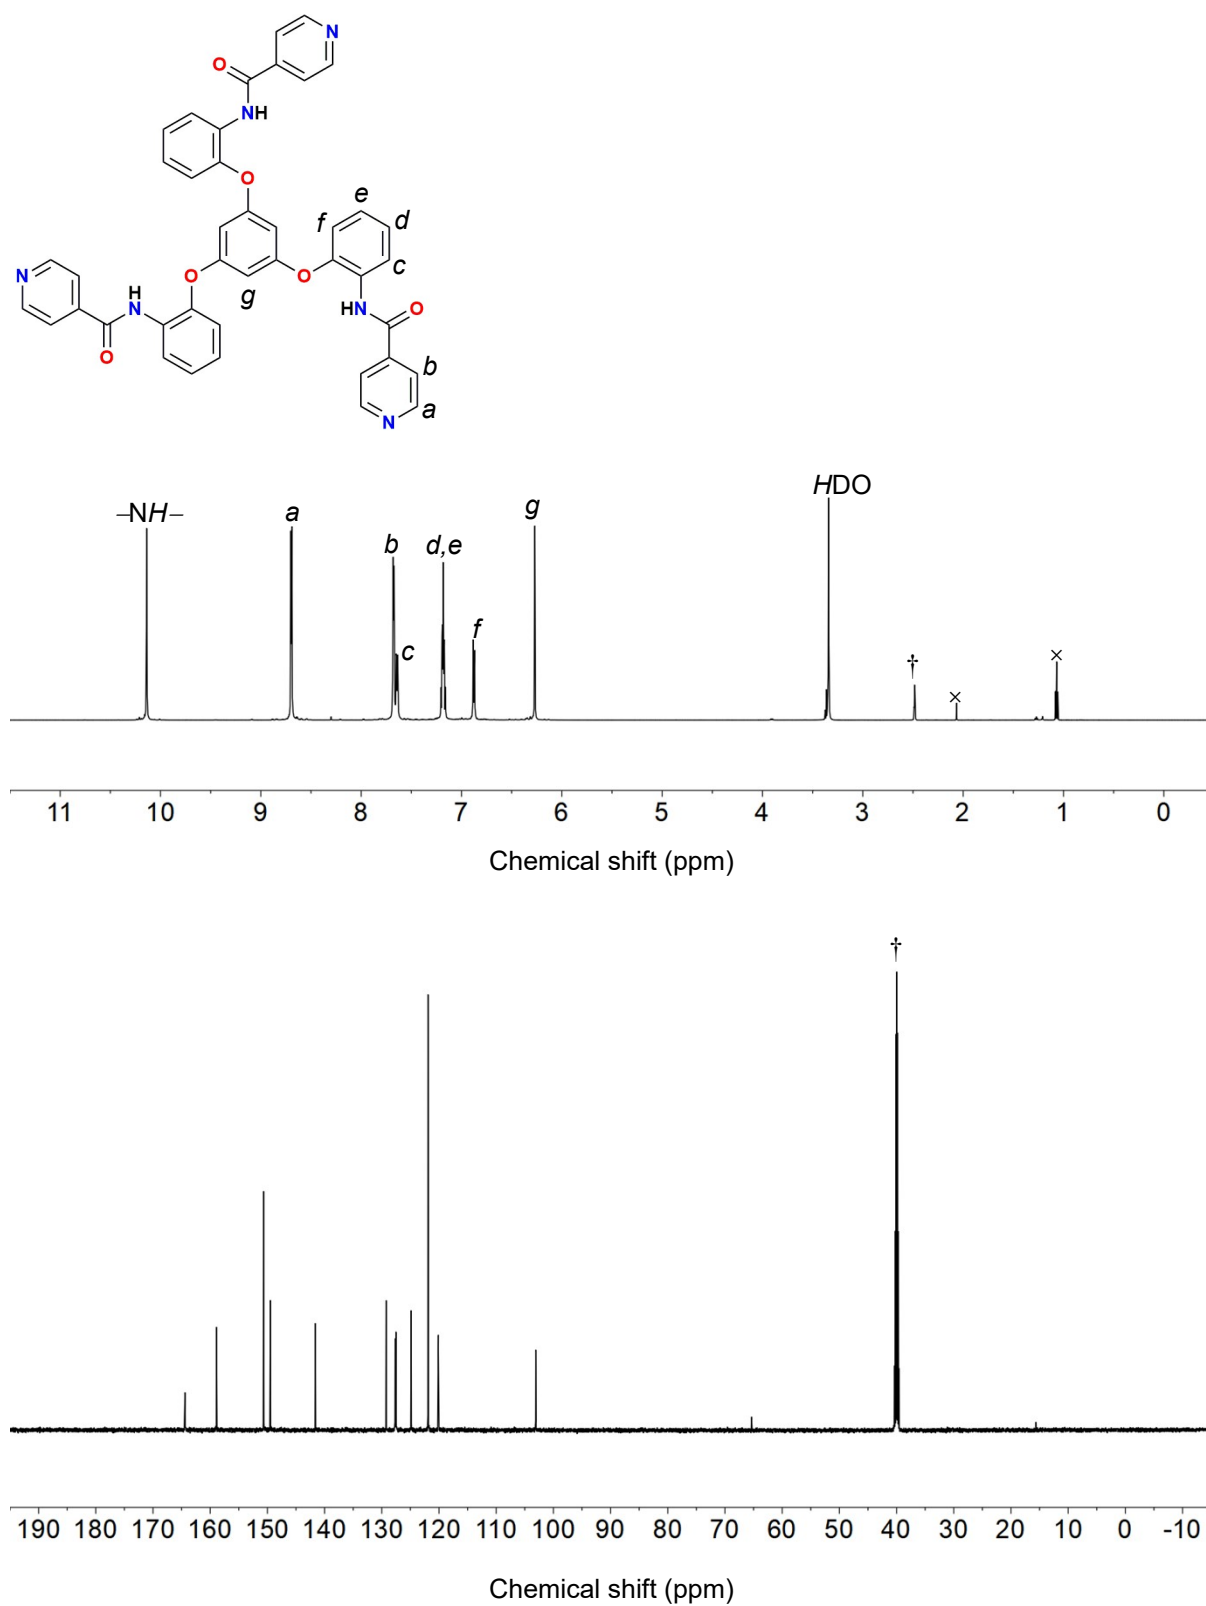

**Figure S3.**  $^1\text{H}$  and  $^{13}\text{C}$  NMR spectrum for and **L** (†: residue of  $\text{Me}_2\text{SO}-d_6$ ).

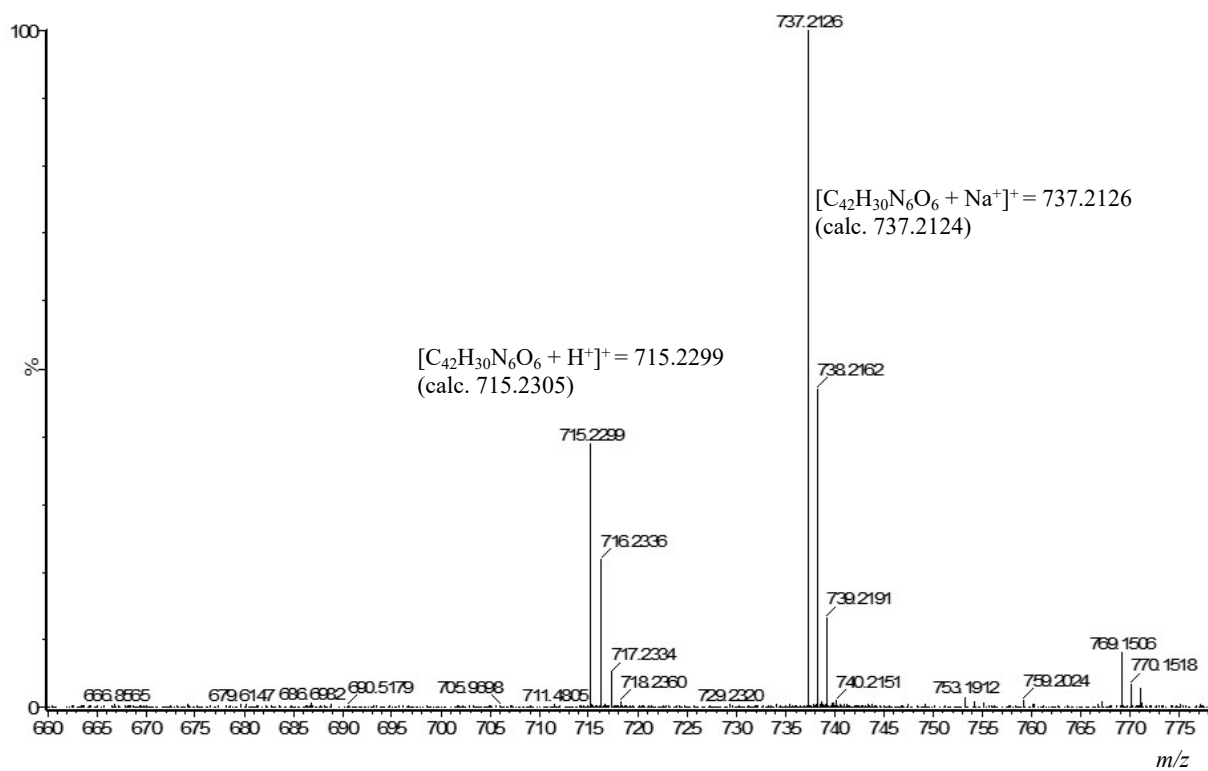

**Figure S4.** HR-ESI Mass spectrum for L.

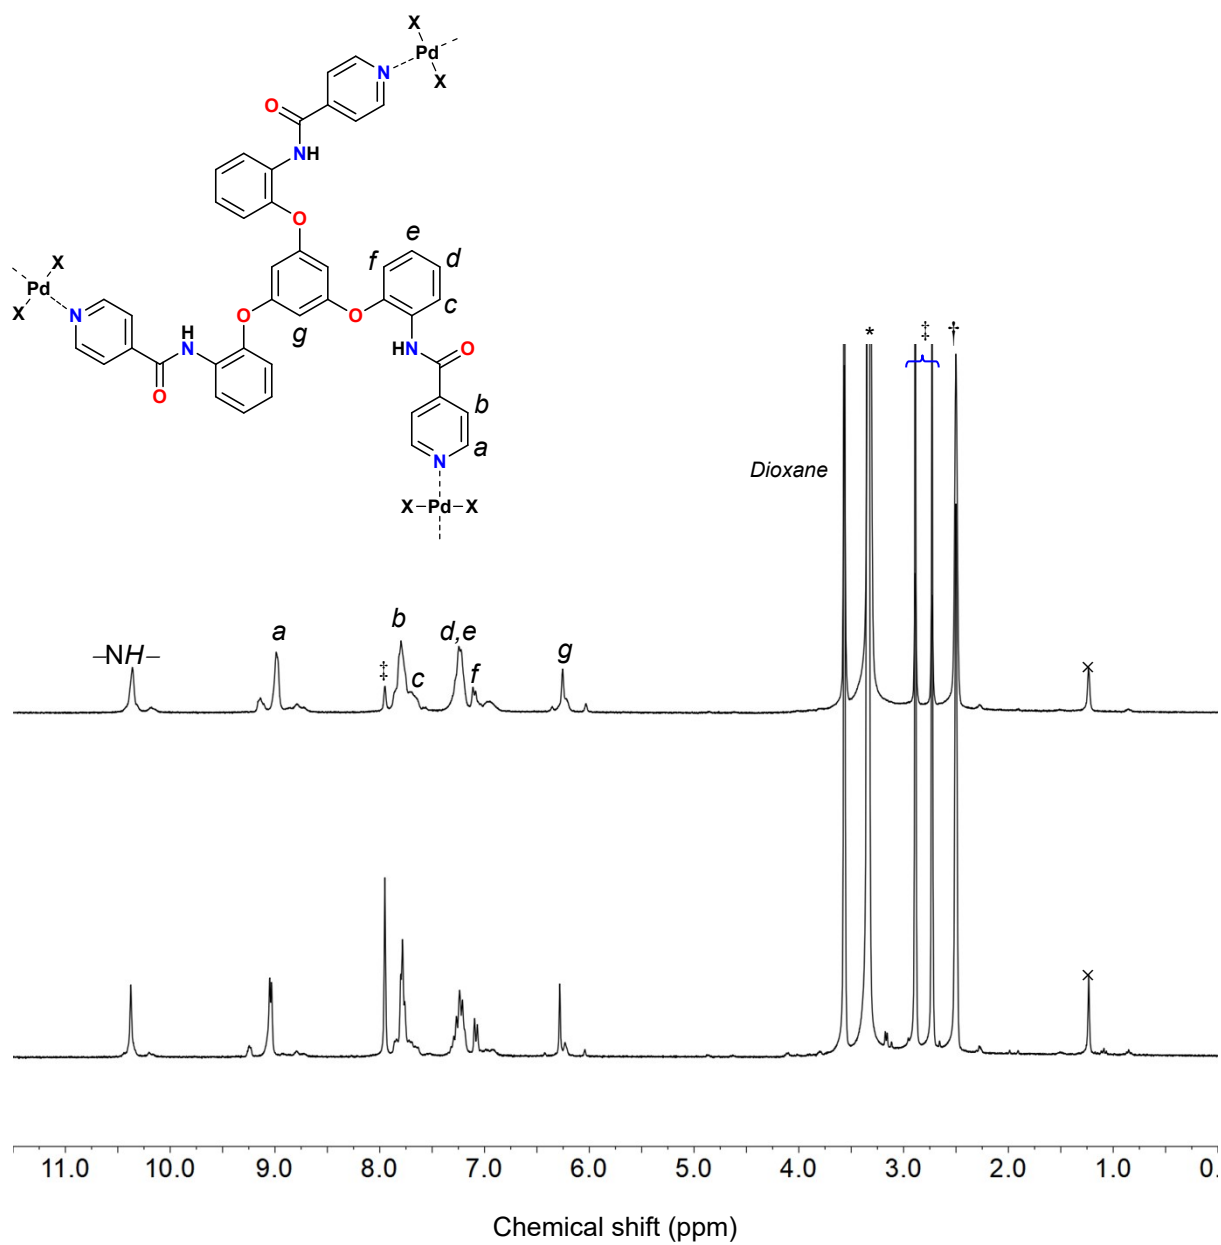

**Figure S5.**  $^1\text{H}$  NMR spectra for  $[\text{Pd}_3\text{Cl}_6\text{L}_2]\cdot 3\text{C}_4\text{H}_8\text{O}_2\cdot 3\text{DMF}$  (top) and  $[\text{Pd}_3\text{Br}_6\text{L}_2]\cdot 2\text{C}_4\text{H}_8\text{O}_2\cdot 5\text{DMF}$  (bottom) crystalline solids in  $\text{Me}_2\text{SO}-d_6$  ( $\dagger$ : residue of  $\text{Me}_2\text{SO}-d_6$ ,  $*$ :HDO,  $\ddagger$ :DMF).

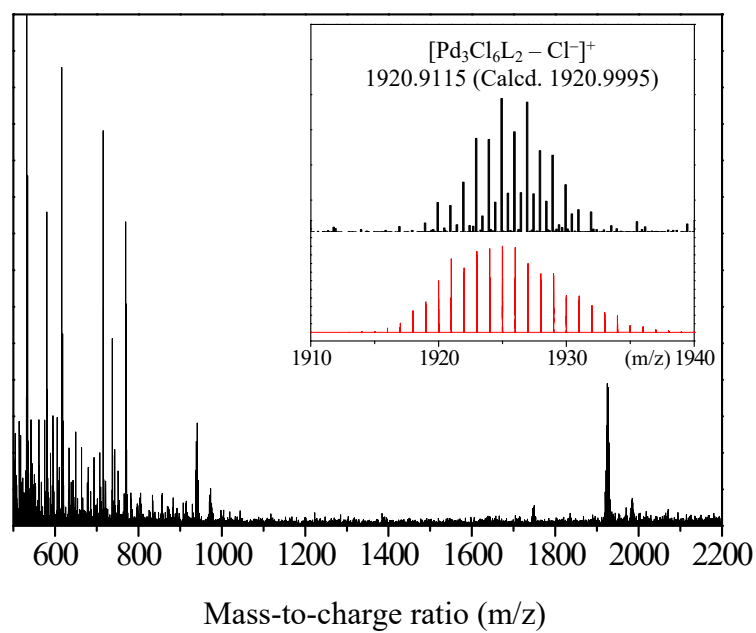

**Figure S6.** ESI-TOF-Mass spectra (black line, experimental; red line, calculated) for  $[\text{Pd}_3\text{Cl}_6\text{L}_2] \cdot 3\text{C}_4\text{H}_8\text{O}_2 \cdot 3\text{DMF}$ .

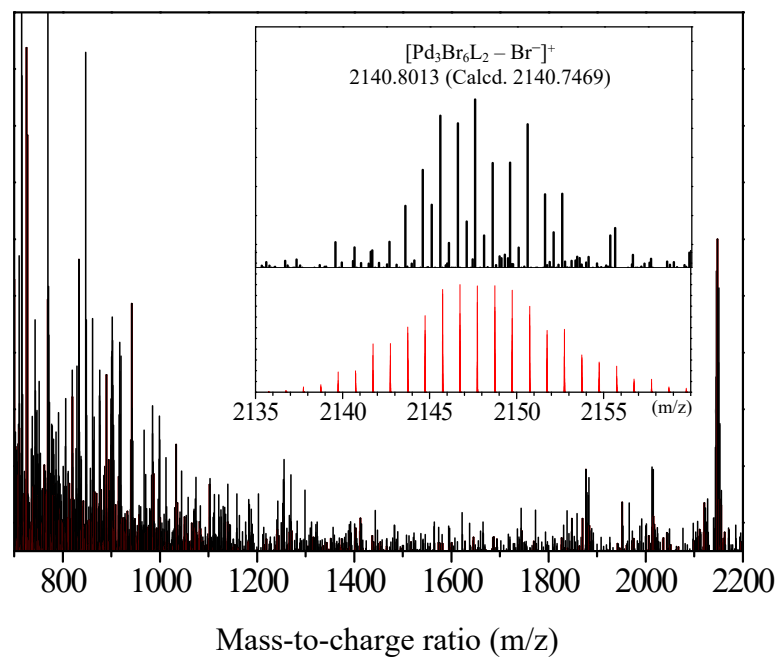

**Figure S7.** ESI-TOF-Mass spectra (black line, experimental; red line, calculated) for  $[\text{Pd}_3\text{Br}_6\text{L}_2] \cdot 2\text{C}_4\text{H}_8\text{O}_2 \cdot 5\text{DMF}$ .



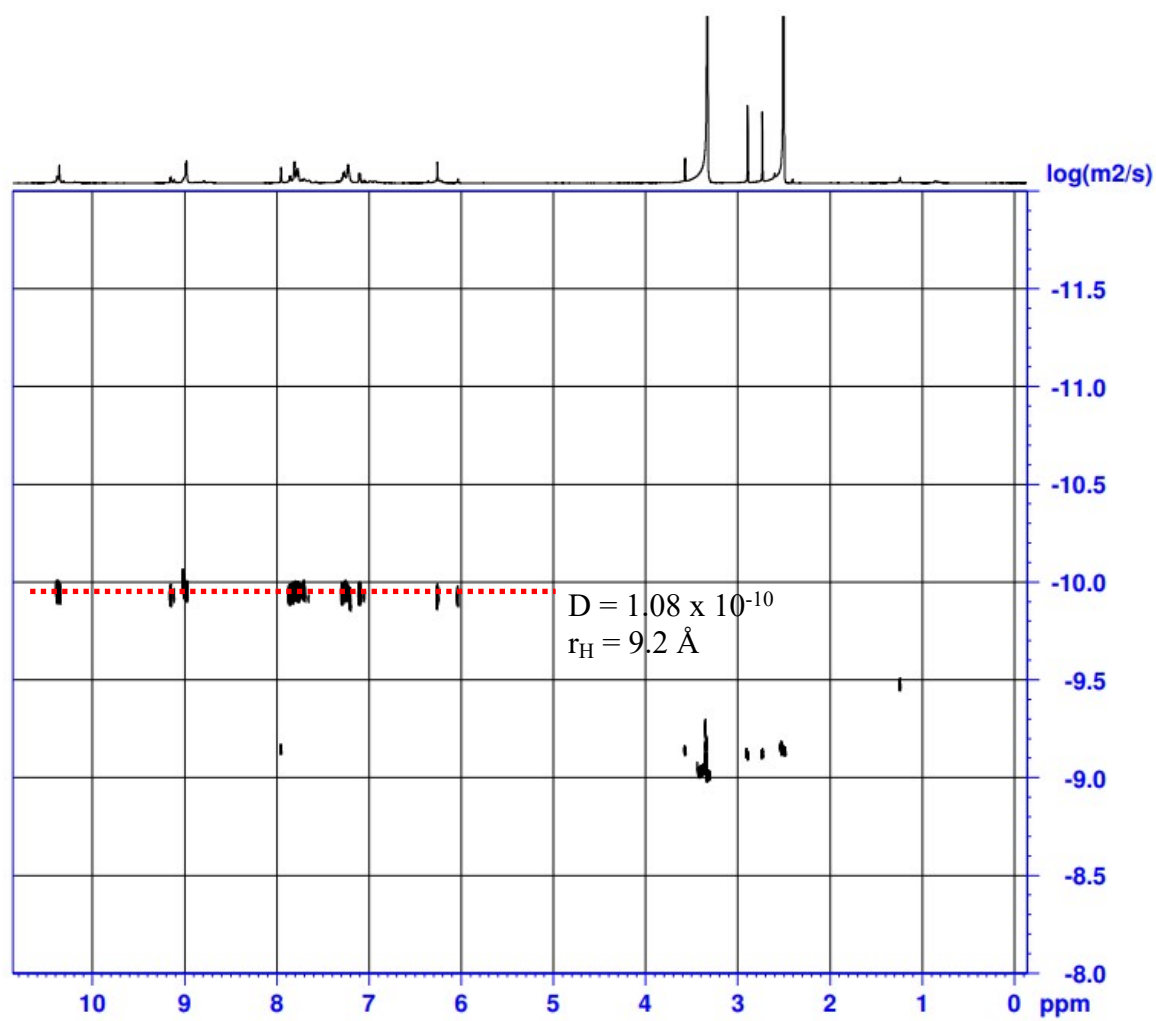

**Figure S8.** DOSY spectra for  $[\text{Pd}_3\text{Cl}_6\text{L}_2] \cdot 3\text{C}_4\text{H}_8\text{O}_2 \cdot 3\text{DMF}$  in  $\text{Me}_2\text{SO}-d_6$  at 25 °C.

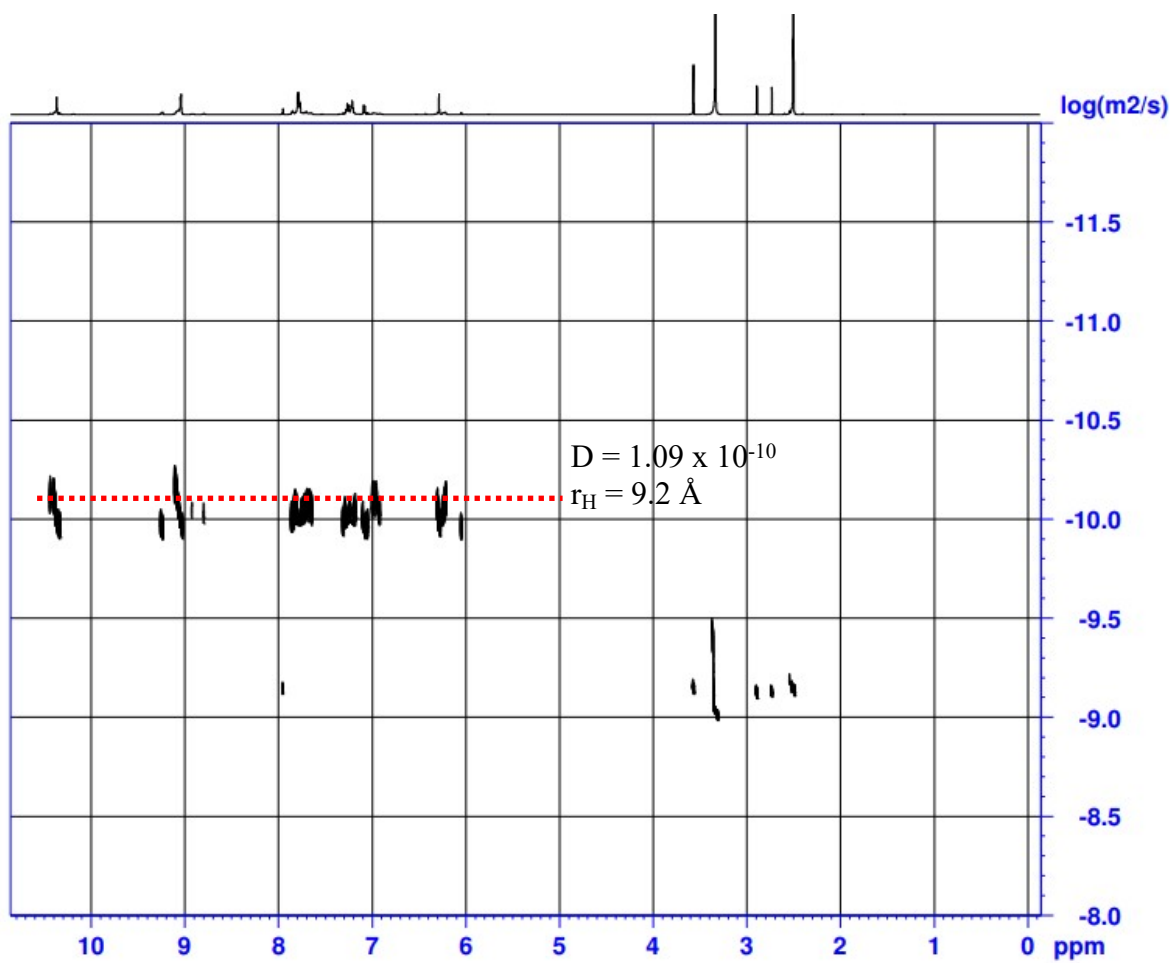

**Figure S9.** DOSY spectra for  $[\text{Pd}_3\text{Br}_6\text{L}_2] \cdot 2\text{C}_4\text{H}_8\text{O}_2 \cdot 5\text{DMF}$  in  $\text{Me}_2\text{SO}-d_6$  at 25 °C.

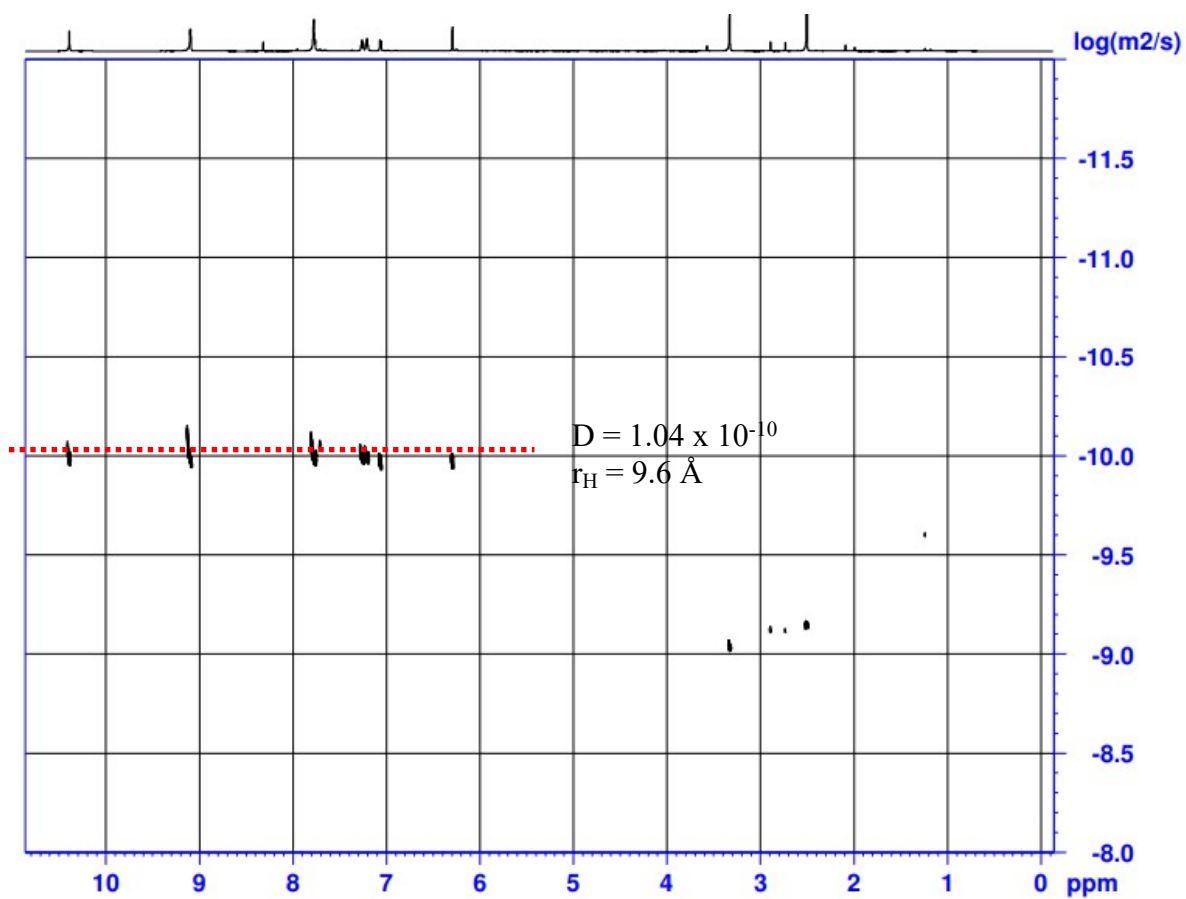

**Figure S10.** DOSY spectra for  $[\text{Pd}_3\text{I}_6\text{L}_2] \cdot \text{C}_4\text{H}_8\text{O}_2 \cdot 2\text{DMF} \cdot 3\text{CH}_2\text{I}_2$  in  $\text{Me}_2\text{SO}-d_6$  at 25 °C.

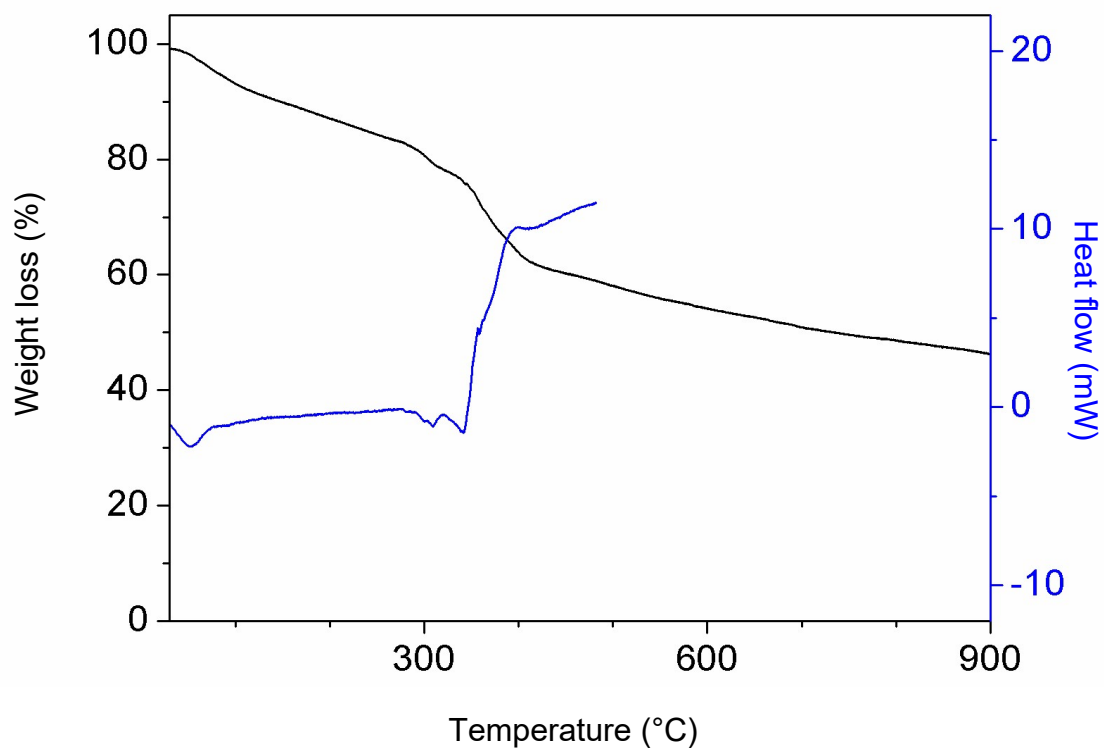

**Figure S11.** Thermogravimetric analysis for  $[\text{Pd}_3\text{Cl}_6\text{L}_2]\cdot 3\text{C}_4\text{H}_8\text{O}_2\cdot 3\text{DMF}$ , weight loss by solvents: 22.3 % (calcd 19.7%), remain: 46.3 %.

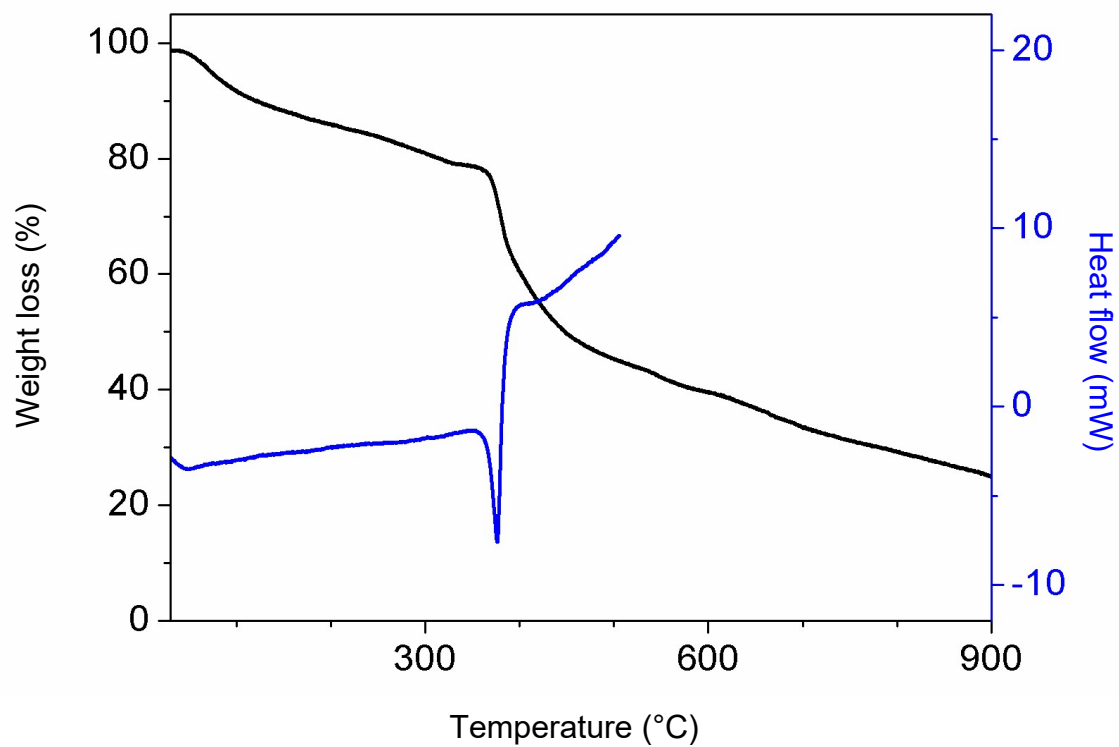

**Figure S12.** Thermogravimetric analysis for  $[\text{Pd}_3\text{Br}_6\text{L}_2]\cdot 2\text{C}_4\text{H}_8\text{O}_2\cdot 5\text{DMF}$ , weight loss by solvents: 21.6 % (calcd 19.6%), remain: 25.0 %.

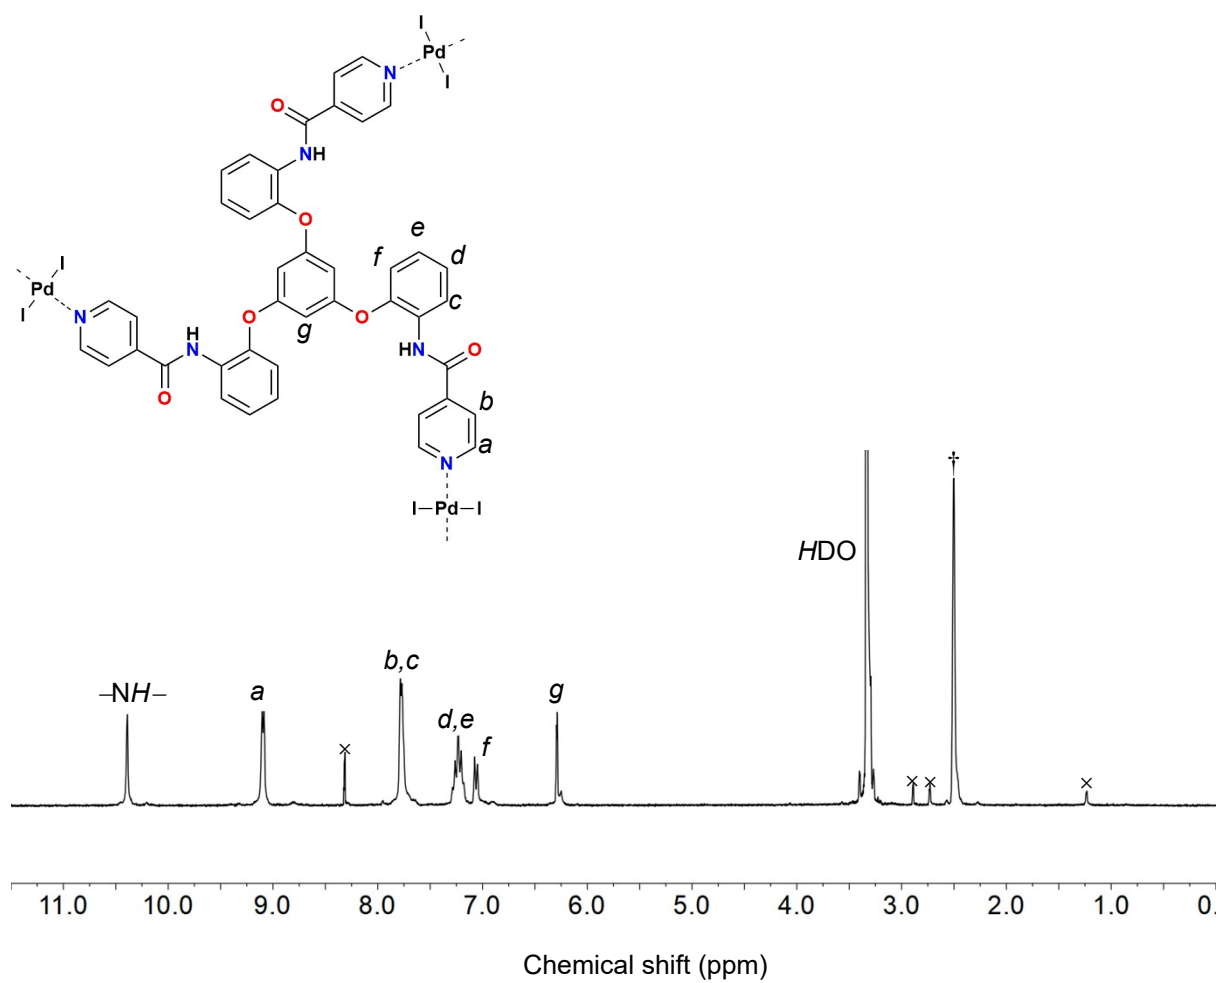

**Figure S13.**  $^1H$  NMR spectrum for  $[Pd_3I_6L_2] \cdot C_4H_8O_2 \cdot 2DMF \cdot 3CH_2I_2$  (†: residue of  $Me_2SO-d_6$ ).

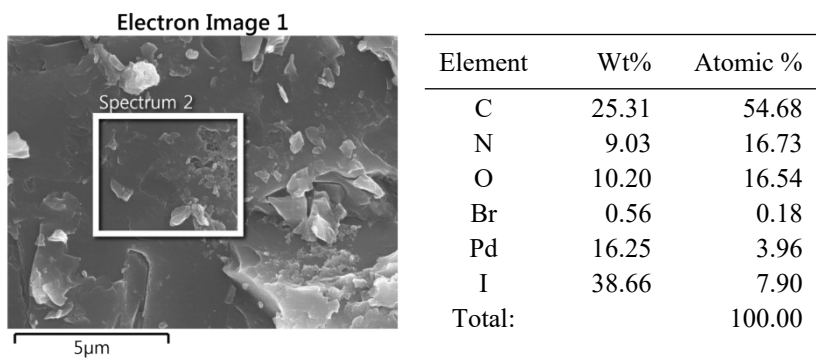

**Figure S14.** Energy dispersive X-ray spectroscopy of  $[\text{Pd}_3\text{I}_6\text{L}_2]$ .

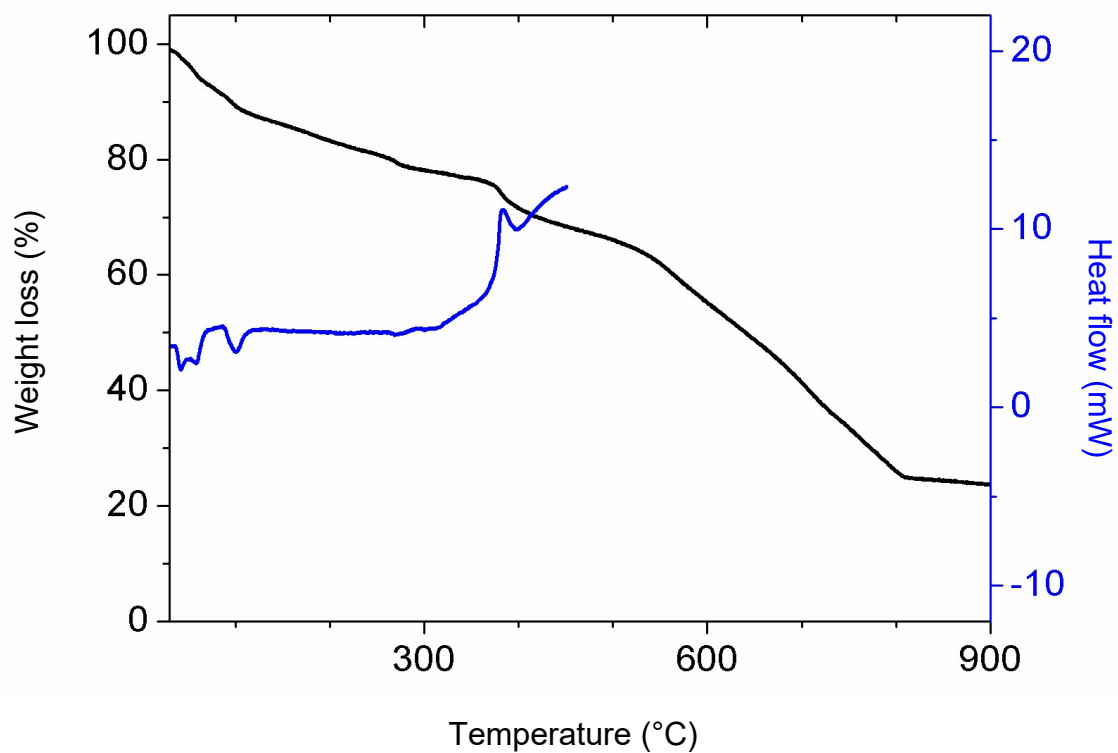

**Figure S15.** Thermogravimetric analysis for  $[\text{Pd}_3\text{I}_6\text{L}_2]\cdot\text{C}_4\text{H}_8\text{O}_2\cdot 2\text{DMF}\cdot 3\text{CH}_2\text{I}_2$ , weight loss by solvents: 24.0 % (calcd 29.2%), remain: 24.3 %.



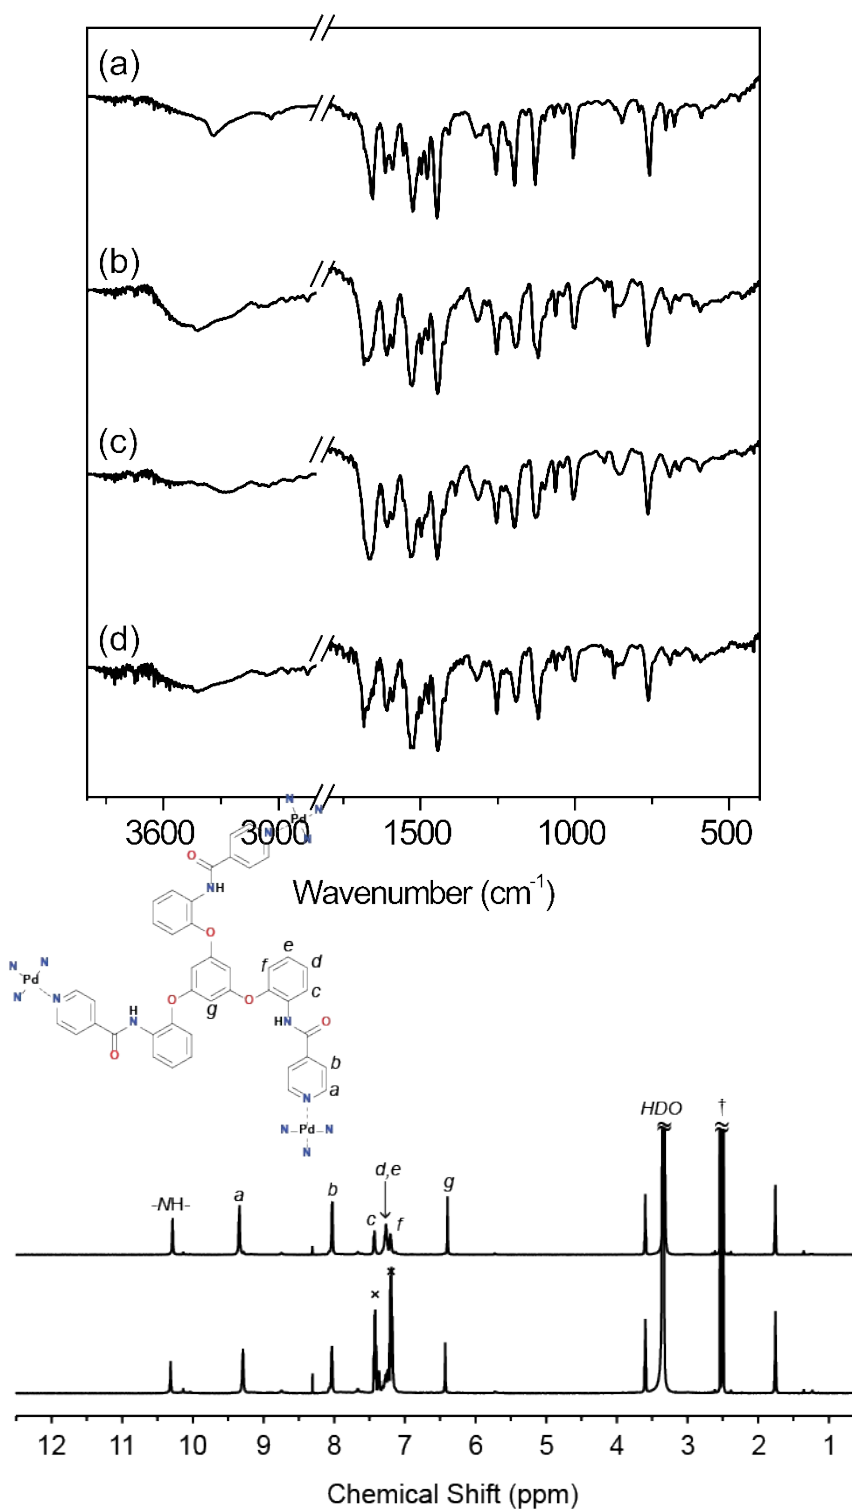

**Figure S16.** IR spectra for **L** (a),  $[\text{Pd}_3\text{Cl}_6\text{L}_2] \cdot 3\text{C}_4\text{H}_8\text{O}_2 \cdot 3\text{DMF}$  (b),  $[\text{Pd}_3\text{Br}_6\text{L}_2] \cdot 2\text{C}_4\text{H}_8\text{O}_2 \cdot 5\text{DMF}$  (c), and  $[\text{Pd}_3\text{I}_6\text{L}_2] \cdot \text{C}_4\text{H}_8\text{O}_2 \cdot 2\text{DMF} \cdot 3\text{CH}_2\text{I}_2$  (d).

**Figure S17.**  $^1\text{H}$  NMR spectra for  $[\text{Pd}_6\text{L}_8](\text{BF}_4)_{12}\cdot 13\text{THF}\cdot 7\text{Me}_2\text{SO}$  (top) and  $[\text{Pd}_6\text{L}_8](\text{CF}_3\text{SO}_3)_{12}\cdot 15\text{THF}\cdot 4\text{Me}_2\text{SO}$  (bottom) in  $\text{Me}_2\text{SO}-d_6$  at 25 °C.

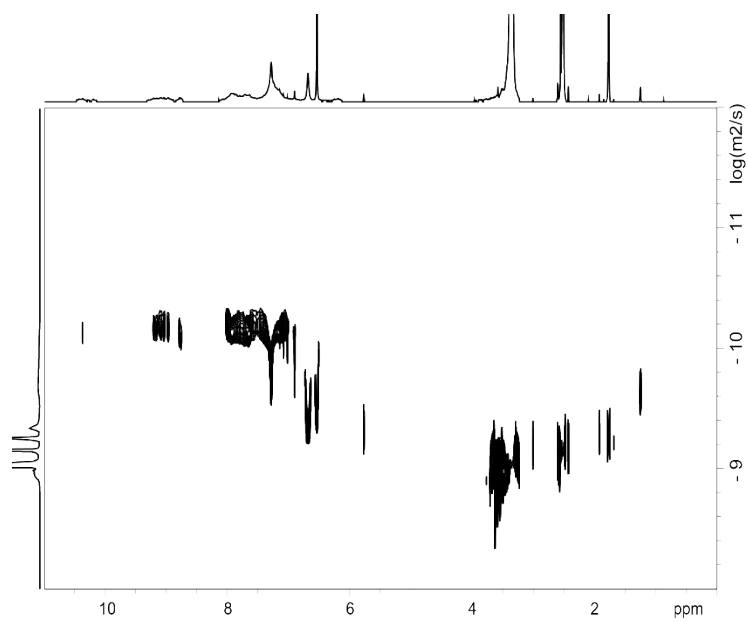

**Figure S18.** DOSY spectra for  $[\text{Pd}_6\text{L}_8](\text{BF}_4)_{12} \cdot 13\text{THF} \cdot 7\text{Me}_2\text{SO}$  in  $\text{Me}_2\text{SO}-d_6$  at 25 °C,  $D = 6.43 \times 10^{-11}$ ,  $r_{\text{H}} = 15.5 \text{ \AA}$ .

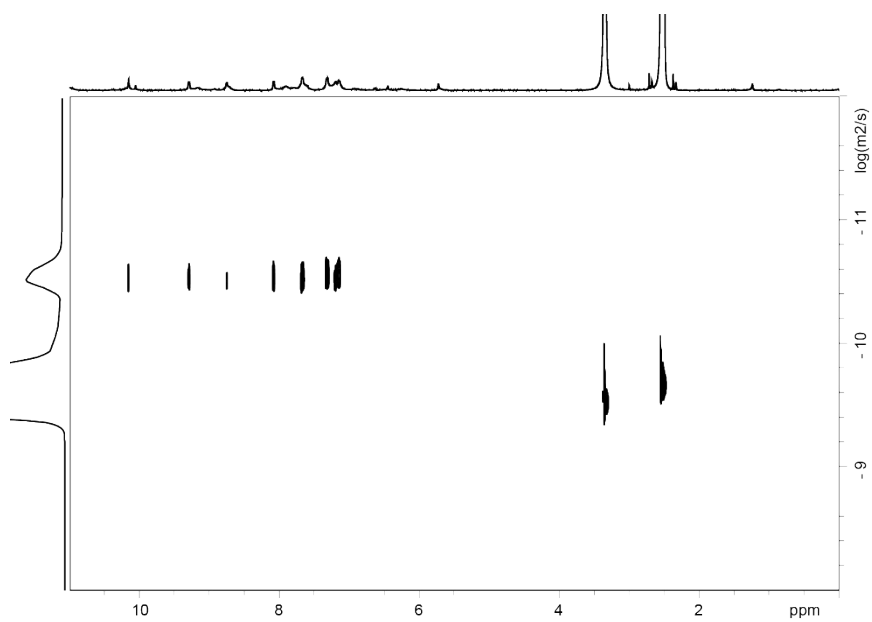

**Figure S19.** DOSY spectra for  $[\text{Pd}_6\text{L}_8](\text{CF}_3\text{SO}_3)_{12} \cdot 15\text{THF} \cdot 4\text{Me}_2\text{SO}$  in  $\text{Me}_2\text{SO}-d_6$  at 25 °C,  $D = 6.40 \times 10^{-11}$ ,  $r_H = 15.6 \text{ \AA}$ .

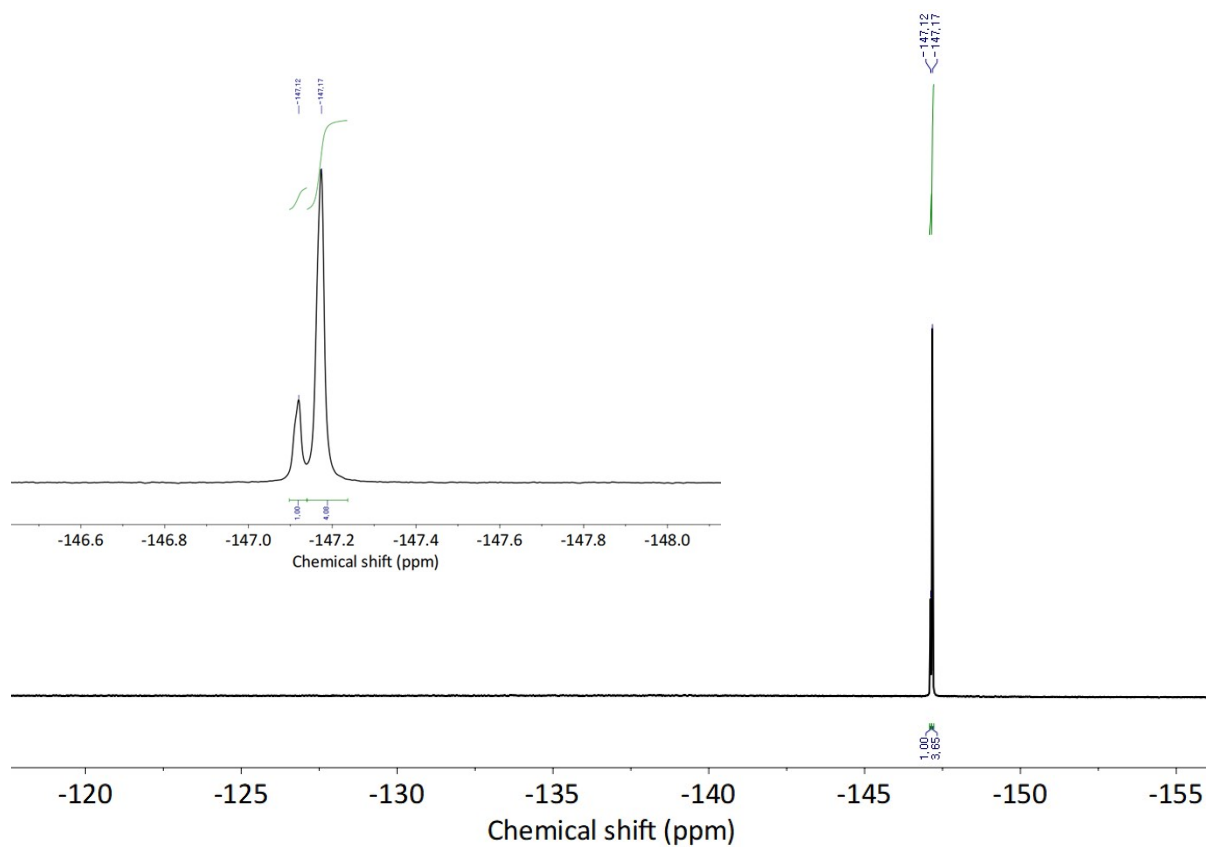

**Figure S20.**  $^{19}\text{F}$  NMR spectra for  $[\text{Pd}_6\text{L}_8](\text{BF}_4)_{12}\cdot 13\text{THF}\cdot 7\text{Me}_2\text{SO}$  in  $\text{Me}_2\text{SO}-d_6$  at  $25\text{ }^\circ\text{C}$ .

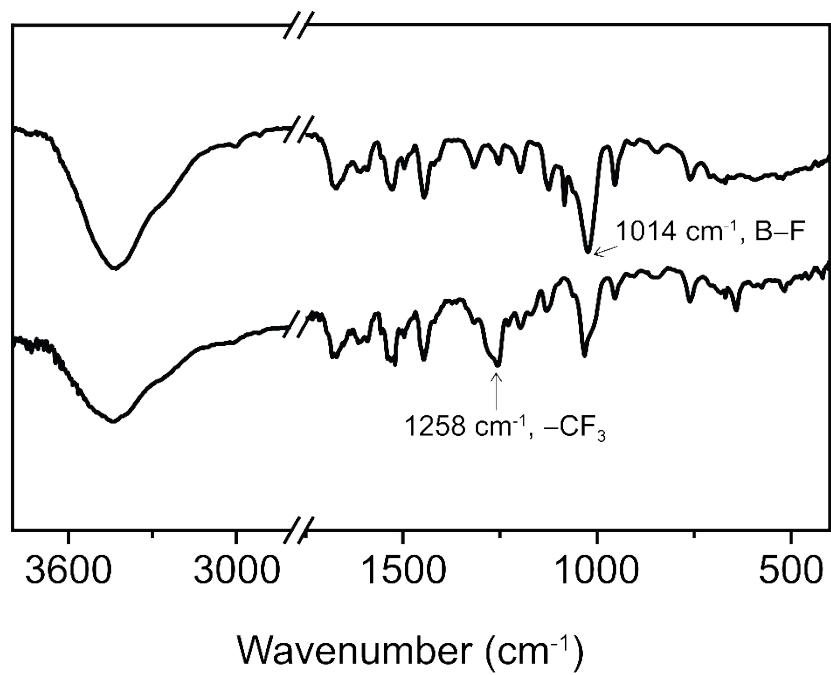

**Figure S21.** IR spectra for [Pd<sub>6</sub>L<sub>8</sub>](BF<sub>4</sub>)<sub>12</sub>·13THF·7Me<sub>2</sub>SO (top) and [Pd<sub>6</sub>L<sub>8</sub>](CF<sub>3</sub>SO<sub>3</sub>)<sub>12</sub>·15THF·4Me<sub>2</sub>SO (bottom).

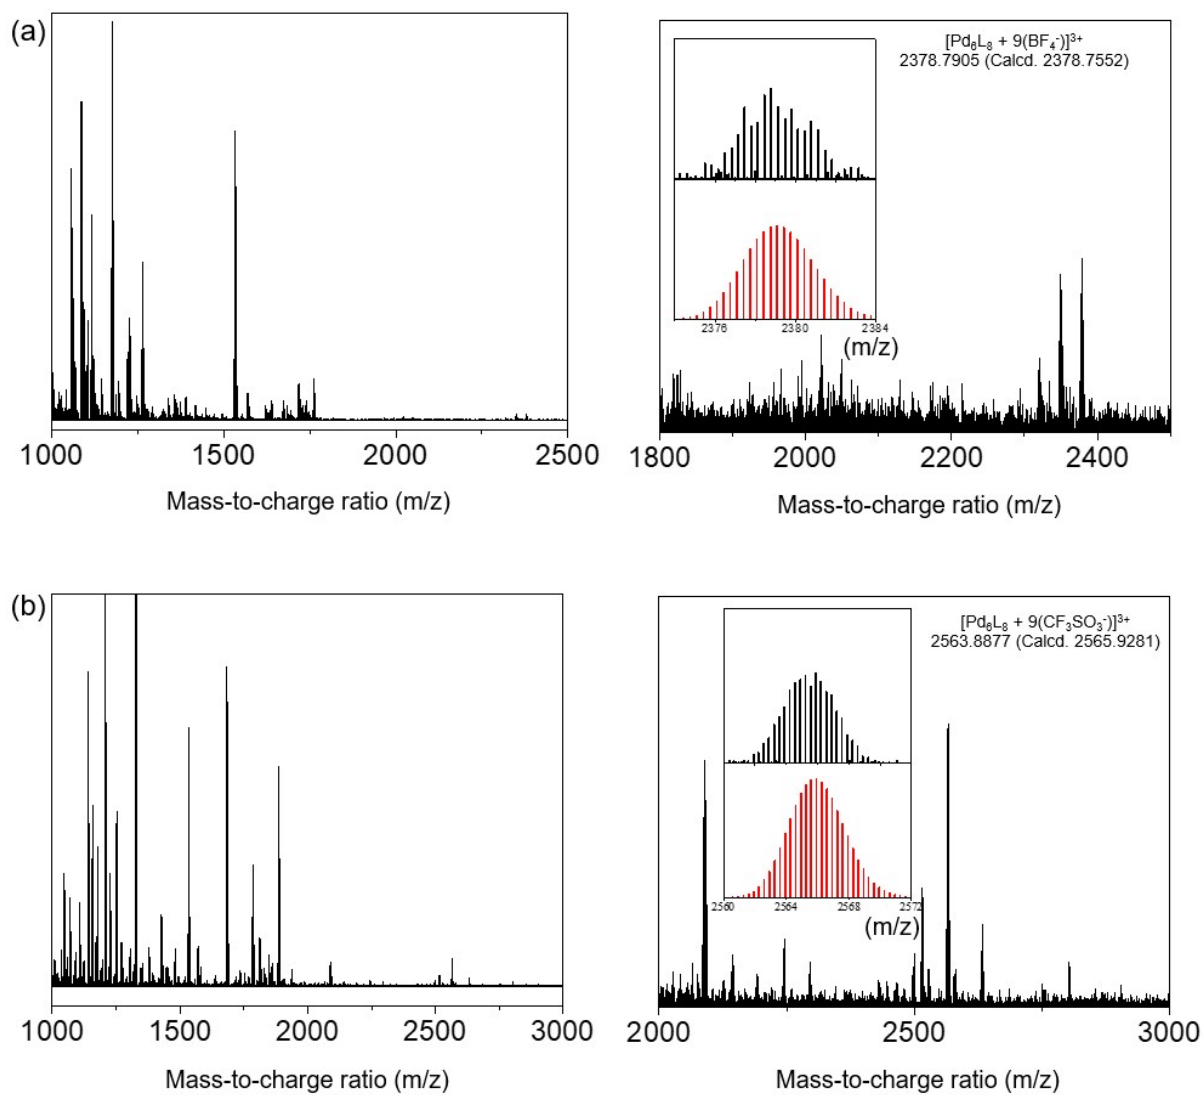

**Figure S22.** HR-ESI-Mass spectra for  $[\text{Pd}_6\text{L}_8](\text{BF}_4)_{12} \cdot 13\text{THF} \cdot 7\text{Me}_2\text{SO}$  (a) and  $[\text{Pd}_6\text{L}_8](\text{CF}_3\text{SO}_3)_{12} \cdot 15\text{THF} \cdot 4\text{Me}_2\text{SO}$  (b); measured, black; calcd, red.

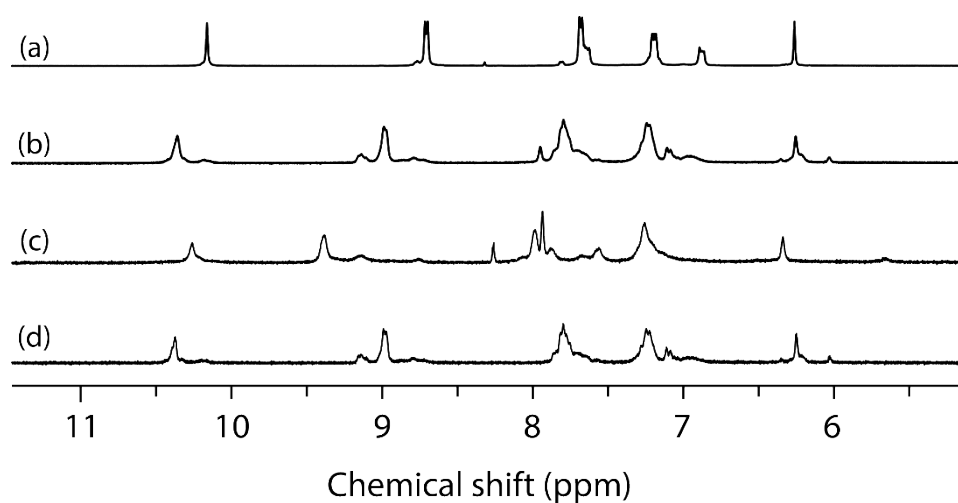

**Figure S23.**  $^1\text{H}$  NMR spectra in  $\text{Me}_2\text{SO}-d_6$  showing structural conversion triggered by anions, (a) L, (b)  $[\text{Pd}_3\text{Cl}_6\text{L}_2]$ , (c) a sample after the addition of stoichiometric amount of  $\text{AgBF}_4$  into (b), and (d) the isolated sample and dissolved in  $\text{Me}_2\text{SO}-d_6$  after the addition of  $\text{NH}_4\text{Cl}$  into (c), the assignment for each peak follows that in Figs. S3 and S5.



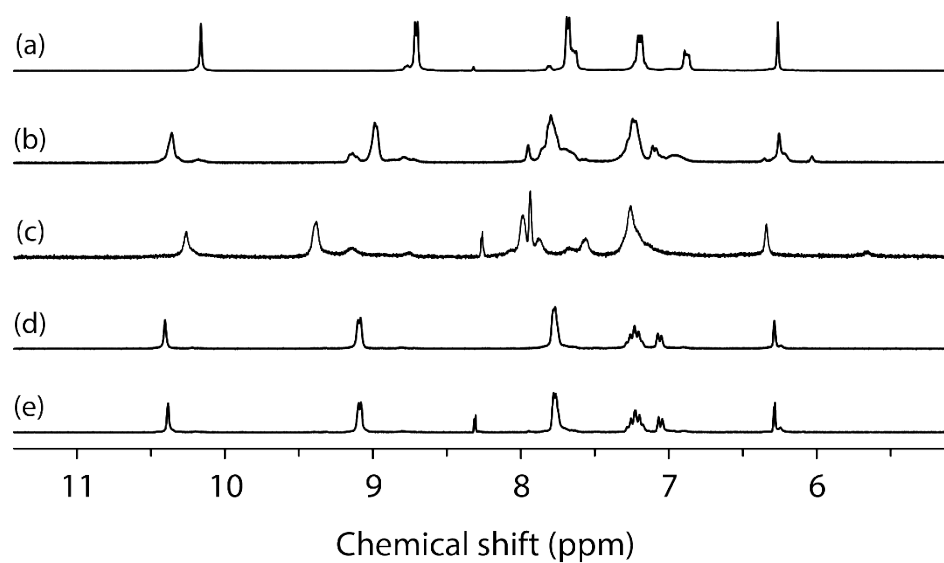

**Figure S24.**  $^1\text{H}$  NMR spectra in  $\text{Me}_2\text{SO}-d_6$  showing structural conversion triggered by anions, (a) L, (b)  $[\text{Pd}_3\text{Cl}_6\text{L}_2]$ , (c) a sample after the addition of stoichiometric amount of  $\text{AgBF}_4$  into (b), (d) the isolated sample and dissolved in  $\text{Me}_2\text{SO}-d_6$  after the addition of  $\text{NEt}_4\text{I}$  into (c), and (e) isolated  $[\text{Pd}_3\text{I}_6\text{L}_2]\cdot\text{C}_4\text{H}_8\text{O}_2\cdot 2\text{DMF}\cdot 3\text{CH}_2\text{I}_2$ , the assignment for each peak follows in Figs. S3, S5, and S13.

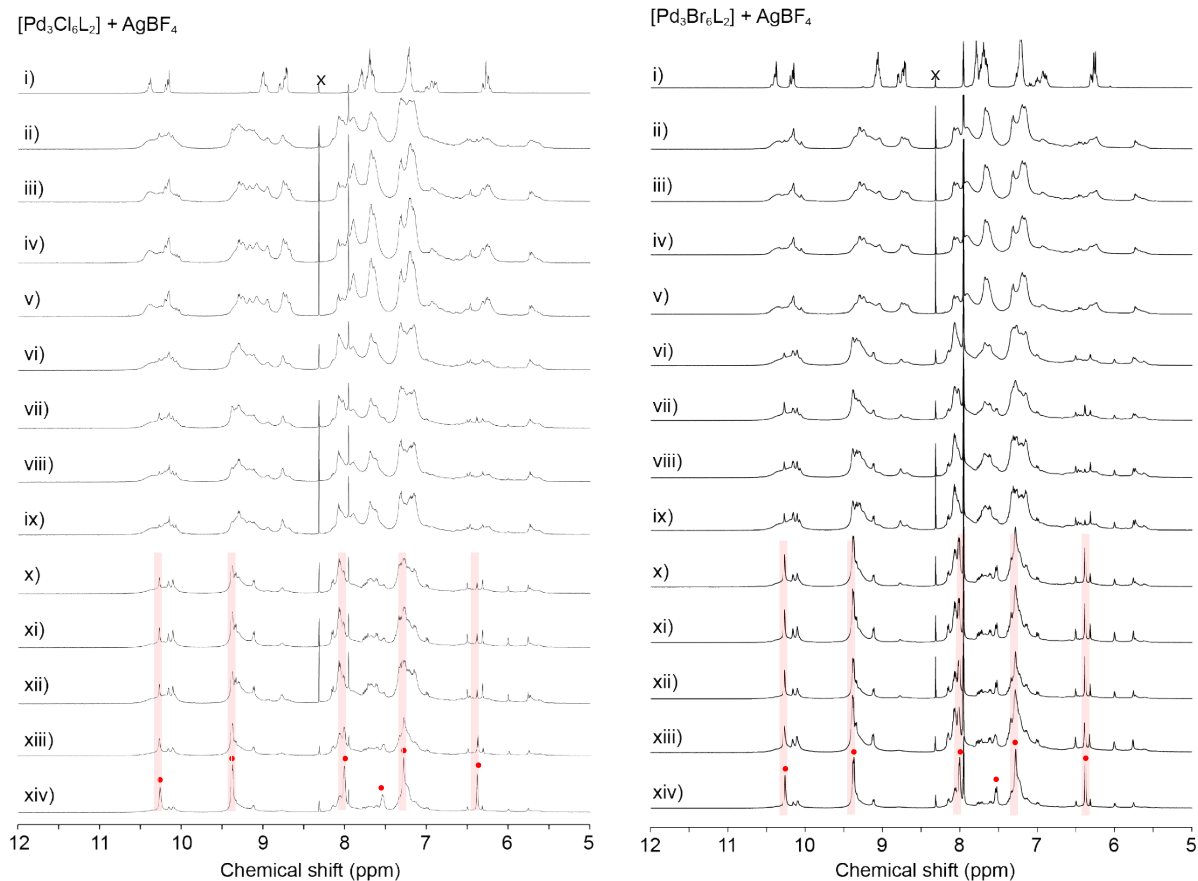

**Figure S25.** Step wise addition of  $\text{AgBF}_4$  to  $\text{Pd}_3\text{Cl}_6\text{L}_2$  and  $\text{Pd}_3\text{Br}_6\text{L}_2$  in  $\text{Me}_2\text{SO}-d_6$ . Each spectrum was obtained in following conditions: i) shows the mixture of  $\text{Pd}_3\text{X}_6\text{L}_2$  and L (1:2). ii) was measured after the addition of 0.25 equiv. of  $\text{AgBF}_4$ . The sample was kept at  $70^\circ\text{C}$  iii) for 30 min, iv) for 3 h, and v) for 60 h in total. Spectrum vi) was obtained with the additional 0.25 equiv. of  $\text{AgBF}_4$  (0.5 equiv. in total). Then the sample was kept vii) at ambiguous temperature for 30 min, viii) heated at  $70^\circ\text{C}$  for 30 min, ix) for 3 hrs. Then x) was obtained with additional 0.25 equiv. of  $\text{AgBF}_4$  (0.75 equiv. in total). The sample was kept xi) at ambiguous temperature for 30 min, xii) heated at  $70^\circ\text{C}$  for 1.5 h. xiii) was obtained after the addition of 1 equiv. of  $\text{AgBF}_4$  in total. xiv) is the spectrum for the sample after heating at  $70^\circ\text{C}$  for 15 h (Red circle:  $\text{Pd}_6\text{L}_8$  cages' signals).

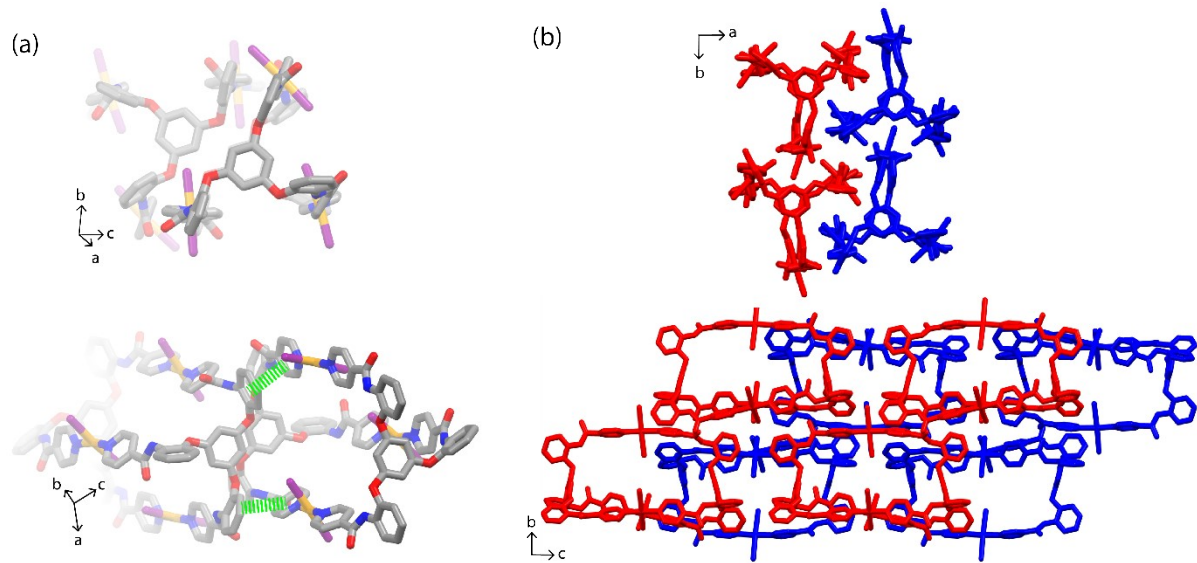

**Figure S26.** Packing structure of (a)  $[\text{Pd}_3\text{I}_6\text{L}_2] \cdot \text{C}_4\text{H}_8\text{O}_2 \cdot 2\text{DMF} \cdot 3\text{CH}_2\text{I}_2$  (green dot line indicates stacking between pyridyl and benzene ring) and (b)  $[\text{Pd}_3\text{I}_6\text{L}_2] \cdot 4\text{Me}_2\text{SO} \cdot \text{MeOH}$  showing columnar packing in  $(001)$  axis (red and blue represent two neighboring columns).

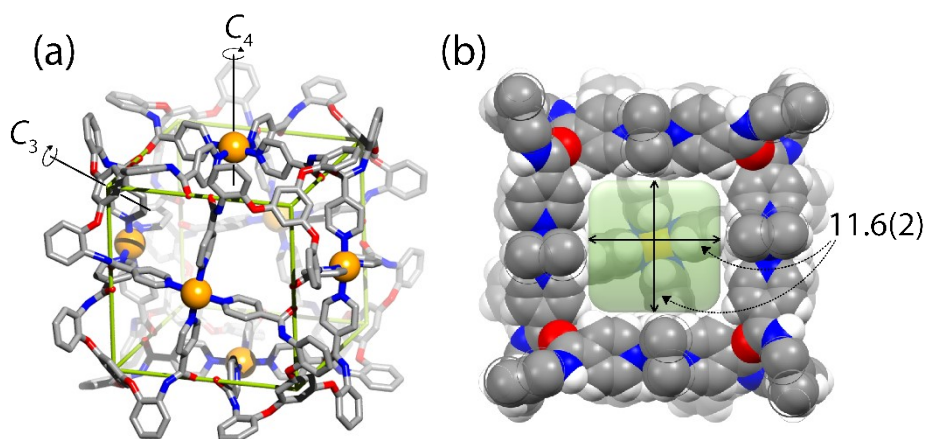

**Figure S27.** The crystal structure of cube  $[\text{Pd}_6\text{L}_8]^{12+}(\text{BF}_4^-)^{12}$  (a) and inner cavity (b).
